# Supplementary material for: Divalent siRNAs are bioavailable in the lung and efficiently block SARS-CoV-2 infection
Source: PubMed Central journal article supplement — Proc Natl Acad Sci U S A. 2023 Mar 9;120(11):e2219523120. doi: 10.1073/pnas.2219523120 (PMC10089225; doi:10.1073/pnas.2219523120), 2023-03-09
Supplement: pnas.2219523120.sapp.pdf [file pnas.2219523120.sapp.pdf]

## Supporting Information for

### Divalent siRNAs are bioavailable in the lung and efficiently block SARS-CoV-2 infection.

Vignesh N. Hariharan<sup>1#</sup>, Minwook Shin<sup>1#</sup>, Ching-Wen Chang<sup>2#</sup>, Daniel O'Reilly<sup>1</sup>, Annabelle Biscans<sup>1</sup>, Ken Yamada<sup>1</sup>, Zhiru Guo<sup>2</sup>, Mohan Somasundaran<sup>3</sup>, Qi Tang<sup>1</sup>, Kathryn Monopoli<sup>1</sup>, Pranathi Meda Krishnamurthy<sup>1</sup>, Gitali Devi<sup>1</sup>, Nicholas McHugh<sup>1</sup>, David A. Cooper<sup>1</sup>, Dimas Echeverria<sup>1</sup>, John Cruz<sup>4</sup>, Io Long Chan<sup>1</sup>, Ping Liu<sup>2</sup>, Sun-Young Lim<sup>2</sup>, Jill McConnell<sup>5</sup>, Satya Prakash Singh<sup>2</sup>, Samuel Hildebrand<sup>1</sup>, Jacquelyn Sousa<sup>1</sup>, Sarah M. Davis<sup>1</sup>, Zachary Kennedy<sup>1</sup>, Chantal Ferguson<sup>1</sup>, Bruno M. D. C. Godinho<sup>1</sup>, Yann Thillier<sup>1</sup>, Jillian Caiazza<sup>1</sup>, Socheata Ly<sup>1</sup>, Manish Muhuri<sup>5,8</sup>, Karen Kelly<sup>1</sup>, Fiachra Humphries<sup>7</sup>, Alyssa Cousineau<sup>6</sup>, Krishna Mohan Parsi<sup>6</sup>, Qi Li<sup>9</sup>, Yang Wang<sup>9</sup>, René Maehr<sup>6</sup>, Guangping Gao<sup>5,8,10</sup>, Dmitry Korkin<sup>11</sup>, William M. McDougall<sup>5</sup>, Robert W. Finberg<sup>2†</sup>, Katherine A. Fitzgerald<sup>7,10\*</sup>, Jennifer P. Wang<sup>2\*</sup>, Jonathan K. Watts<sup>1, 10\*</sup>, and Anastasia Khvorova<sup>1\*</sup>

<sup>1</sup>RNA Therapeutics Institute, <sup>2</sup>Department of Medicine, <sup>3</sup>Department of Biochemistry and Molecular Biotechnology, <sup>4</sup>Department of Pathology, <sup>5</sup>Department of Microbiology and Physiological Systems, <sup>6</sup>Diabetes Center of Excellence and Program in Molecular Medicine, <sup>7</sup>Program in Innate Immunity, Division of Infectious Diseases and Immunology, Department of Medicine, <sup>8</sup>Horae Gene Therapy Center, <sup>9</sup>MassBiologics, <sup>10</sup>Li Weibo Institute for Rare Diseases Research, University of Massachusetts Chan Medical School; <sup>11</sup>Department of Computer Science, and Bioinformatics and Computational Biology Program, Worcester Polytechnic Institute; Worcester, USA.

\*Corresponding authors. Email: [kate.fitzgerald@umassmed.edu](mailto:kate.fitzgerald@umassmed.edu); [jennifer.wang@umassmed.edu](mailto:jennifer.wang@umassmed.edu); [jonathan.watts@umassmed.edu](mailto:jonathan.watts@umassmed.edu); [anastasia.khvorova@umassmed.edu](mailto:anastasia.khvorova@umassmed.edu)

#These authors contributed to the paper equally

†This paper is dedicated to the memory of Robert W. Finberg, a great physician-scientist and mentor whose contributions to the COVID-19 response are invaluable.

#### This PDF file includes:

Supplementary Methods  
Figures S1 to S13  
Supplemental Table 1

# **Divalent siRNAs are bioavailable in the lung and efficiently block SARS-CoV-2 infection**

## **Supplementary Methods**

### **Methods for designing SARS-CoV-2-targeting siRNAs Considering both Macro and Microevolution of the Virus**

#### **Phylogenetic Tree Construction**

Closely related coronavirus species were selected based on prior analysis of the coronavirus lineage<sup>57</sup> to perform analysis of family homology. Genomic sequences of related coronaviruses and a representative group of five SARS-CoV-2 patient isolates (including the Wuhan-Hu-1 genome, which was our target sequence for siRNA design) were aligned using MAFFT<sup>58</sup>. We applied the rapid phylodynamic alignment pipeline included in the Augur package<sup>59</sup>. The phylogenetic tree was built using maximum likelihood with the Augur package following the RAxML (Randomized Axelerated Maximum Likelihood) method<sup>60</sup>.

#### **siRNA Selection**

We designed SARS-CoV-2-targeting siRNAs with a twenty-nucleotide sequence containing a 16mer complementary region between positions 4 and 19 that is complementary to the target transcript. These siRNA sequences were then scored by their predicted efficiency to knockdown the target transcript. This scoring algorithm is described in greater detail elsewhere<sup>36</sup>. siRNAs containing the following features which predict poor functionality were excluded: a GC content greater than 56%, cross-reactivity (perfect complementarity through the 16mer complementary region) to any human transcripts, sequences containing microRNA seeds between positions 2 and 7 on the siRNA, and those containing stretches of five or more A's, U's, C's, or G's.

Since viral targets are known to mutate frequently, it is imperative to select siRNAs targeting regions that are predicted to remain constant. Regions least likely to mutate were identified as those with high homology to the genomes of 43 other closely related coronaviruses identified through localized genomic analysis<sup>61</sup> as this homology indicates low rates of mutation within these regions. We identify this as the "Family Homology" as this follows the macroevolution of the virus. The percent homology to the related coronavirus genomes were determined at every position for each of the SARS-CoV-2 target genes by comparing percentage homology to alignments of the six related coronavirus genomes at these positions. This was performed efficiently by conducting a multiple sequence alignment with the Clustal Omega Multiple Sequence Alignment tool<sup>62</sup> with default parameters. The percent homology to each related coronavirus were identified at each position of the SARS-CoV-2 genomic sequence using an alignment visualization tool such as the Jalview Viewer<sup>63</sup> with the SARS-CoV-2 sequence set as the consensus sequence. siRNA sequences were then ranked by their homology to the related coronavirus strains. This is straightforward as the siRNA sequences are derived directly from the SARS-CoV-2 genomic sequence (the consensus sequence for the alignment). The related

coronavirus genomes are fairly divergent from SARS-CoV-2 (~48% overall homology), and as such, few SARS-CoV-2-targeting siRNAs will have complete complementarity through the 16mer complementary region to all six related coronaviruses. Therefore, to identify siRNAs likely to target homologous regions, siRNAs were ranked first by the number of nucleotides within the sequence having a percentage homology greater than 70% within positions 3-9 and then by those with greater than 50% homology for at least 10 bases within the remaining positions of the 16mer complementary region. The top-ranking siRNAs were selected for further analysis.

To further optimize siRNA targeting of SARS-CoV-2, sequence data from SARS-CoV-2 isolates from COVID-19 patients were utilized to identify siRNAs that have the greatest potential to target a broad range of human-infecting SARS-CoV-2 variants. This we identify as the “Population Homology” as this follows the microevolution of the virus. These sequences were obtained from the GISAID Database <sup>64</sup>, which at the time of analysis contained 53,792 such sequences. Note that not all SARS-CoV-2 sequences from patient isolates are high quality or complete genomes; sequences that are less than 97% complete (sequence length shorter than 29,000 nucleotides) and those containing >5% gaps of four nucleotides or more) were excluded from this analysis along with duplicate sequences. At the time of publication 45,668 sequences from patient isolates fit this criterion. To target only a portion of the SARS-CoV-2 genome rather than all nine transcripts, this criterion can be modified to include all isolates with sequences that are complete within the genomic region of interest. To identify siRNAs that target the greatest number of sequences from patient isolates, the sequences from the patient isolates were aligned with the target SARS-CoV-2 genomic sequence from which the siRNAs were derived using the Clustal Omega Multiple Sequence Alignment tool <sup>62</sup> with default parameters. The percent homology of each patient isolate sequence to the target SARS-CoV-2 genomic transcript were identified at each position of the SARS-CoV-2 genomic transcript. Targeting siRNAs were then scored by their percentage identity to the patient isolates. To do this we computed the normal of the 16mer complementary region by computing the sum of the squared percentage identities of the 16mer (Equation 1), with any 16mers overlaying with gaps being given a score of zero. The final score was computed by taking the square root of this value and dividing by the maximum homology value (400) to generate a homology percentage score. This scoring scheme was used to compute both the population homology score percent as well as the family homology score. The functionality score was normalized by the highest homology score to convert the value to percentages. The final score was a combination of the population and family homology scores with each contributing an equal component to the score as well as the functionality score (Equation 2). The top-ranking siRNAs were then selected. This is straightforward as the siRNA sequences are derived directly from the SARS-CoV-2 genomic sequence (the alignment consensus sequence). Commonly homology analyses utilize theoretical measures to perform homology scoring <sup>65</sup>, however since siRNAs are designed to target the messenger RNA sequence directly, scoring based directly on the sequence is appropriate.

$$\text{Equation 1. Homology Score (\%)} = 100\% \times \frac{\sqrt{\sum_{i=1}^{16} (\text{Identity } \%_i)^2}}{400}$$

$$\text{Equation 2. } \textit{Final Score} (\%) = \frac{\textit{PH score} (\%)}{4} + \frac{\textit{FH score} (\%)}{4} + \frac{\textit{Functionality Score} (\%)}{2}$$

Normalized efficacy, population homology, and family homology scores were then compiled into a single final score. To compile, both homology scores were weighted by 0.5 while the efficacy score was weighted by 1 to ensure only functional siRNAs were selected<sup>36</sup>. This final score was used to select the top siRNA sequences, ten targeting each of the nine SARS-CoV-2 genes.

### **Oligonucleotide synthesis**

Oligonucleotides were synthesized by phosphoramidite solid-phase synthesis on a Dr Oligo 48 (BioLytic, Fremont, CA), MerMade12 (Biosearch Technologies, Novato, CA) or AKTA Oligoplilot 10 (Cytiva, Marlborough, MA) using 2'-F-RNA, 2'-O-Me-RNA, LNA or DNA phosphoramidites with standard protecting groups. 5'-(*E*)-Vinyl tetra phosphonate (pivaloyloxymethyl) 2'-O-methyl-uridine 3'-CE phosphoramidite (VP) was purchased from Hongene Biotech, Union City, CA, Cy3 phosphoramidite (Quasar 570 CE) was purchased from GenePharma, Shanghai, China. Trivalent and tetravalent oligonucleotides were prepared using commercial trebler and doubler phosphoramidites, respectively, purchased from Glen Research, Sterling, VA. All other phosphoramidites used were purchased from ChemGenes, Wilmington, MA. Phosphoramidites were dissolved to 0.1 M in anhydrous acetonitrile (ACN), except for 2'-O-methyl-uridine phosphoramidite which was dissolved in anhydrous ACN containing 15% dimethylformamide. 5-(Benzylthio)-1*H*-tetrazole (BTT) was used as the activator at 0.25 M and the coupling time for all phosphoramidites was 4 min, except for trebler and doubler where the coupling time used was 8 min. Detritylations were performed using 3% trichloroacetic acid in dichloromethane. Capping reagents used were CAP A (20% *n*-methylimidazole in can) and CAP B (20% acetic anhydride and 30% 2,6-lutidine in ACN). Reagents for capping and detritylation were purchased from AIC, Westborough, MA. Phosphite oxidation to convert to phosphate was performed with 0.05 M iodine in pyridine-H<sub>2</sub>O (9:1, v/v) or for phosphorothioate linkages the oxidation was performed with a 0.1 M solution of 3-[(dimethylaminomethylene)amino]-3*H*-1,2,4-dithiazole-5-thione (DDTT) in pyridine (ChemGenes) for 4 min. Unconjugated oligonucleotides were synthesized on 500Å (or 1000Å for trivalent and tetravalent oligonucleotides) long-chain alkyl amine (LCAA) controlled pore glass (CPG) functionalized with Unylinker terminus (ChemGenes). Cholesterol-conjugated oligonucleotides were synthesized on a 500Å LCAA-CPG support, where the cholesterol moiety is bound to tetra-ethylenglycol through a succinate linker (ChemGenes). Divalent oligonucleotides (DIO) were synthesized on modified solid support<sup>43</sup>. DCA and EPA conjugated oligonucleotides were synthesized on modified solid support<sup>41</sup>.

### **Deprotection and purification of oligonucleotides for screening of sequences**

Prior to the deprotection, synthesis columns containing oligonucleotides were treated with 10% diethylamine (DEA) in ACN to deprotect cyanoethyl groups. In synthesis columns, both unconjugated and cholesterol conjugated oligonucleotides on solid support were then deprotected with methylamine gas (Airgas, Radnor, PA) for an hour at room temperature. Deprotected oligonucleotides released from the solid support were precipitated on the support by passing

solution of (i) a mixture of 0.1 M sodium acetate in 85% ethanol and then (ii) 85% ethanol to the synthesis column. The excess ethanol on solid support was dried by air flow and the oligonucleotides were flushed out by passing water through the column. This procedure renders pure oligonucleotides used for *in vitro* experiments.

### **Deprotection and purification of oligonucleotides for *in vivo* experiments**

Prior to the deprotection, oligonucleotides on solid support were treated with 10% DEA in ACN in synthesis columns to deprotect cyanoethyl groups. Cy3-labeled and non-labeled DCA and EPA conjugated oligonucleotides were cleaved and deprotected in 28-30% ammonium hydroxide-40% aq. methylamine (1:1, v/v) (AMA) for 2 hours at room temperature. Cy3-labeled and non-labeled unconjugated, divalent, trivalent and tetravalent oligonucleotides were cleaved and deprotected by AMA treatment for 2 hours at 45°C. The VP-containing oligonucleotides were not pretreated with DEA post-synthesis and were cleaved and deprotected as described previously<sup>66</sup>. Briefly, CPG with VP-oligonucleotides was treated with a solution of 3% DEA in 28-30% ammonium hydroxide at 35°C for 20 hours.

All solutions containing cleaved oligonucleotides were filtered to remove the CPG and dried under vacuum. The resulting pellets were re-suspended in 5% ACN in water. Purifications were performed on an Agilent 1290 Infinity II HPLC system (Agilent, Santa Clara, CA). VP and non-labeled unconjugated, divalent, trivalent and tetravalent oligonucleotides were purified using a custom 20x150 mm column packed with Source 15Q anion exchange resin (Cytiva); running conditions: eluent A, 10 mM sodium acetate (pH 5) in 20% ACN in water; eluent B, 1 M sodium perchlorate in 20% ACN in water; linear gradient, 10 to 35% B in 40 min at 50°C. DCA, EPA conjugated and Cy3 labeled oligonucleotides were purified using a 21.2x150mm PRP-C18 column (Hamilton, Reno, NV); running conditions: eluent A, 50 mM sodium acetate (pH 6) in 5% ACN in water; eluent B, 100% ACN; linear gradient, 25 to 60% B in 40 min at 60°C. Flow was 30 mL/min in both methods and peaks were monitored at 260 nm for non-labeled oligonucleotides and 550 nm for labeled oligonucleotides. A separate column was used for Cy3-labeled oligonucleotides to avoid cross-contamination. Fractions were analyzed by liquid chromatography mass spectrometry (LC-MS), pure fractions combined and dried under vacuum. Oligonucleotides were re-suspended in 5% ACN and desalted by size exclusion on a 25x250 mm custom column packed with Sephadex G-25 media (Cytiva), and lyophilized.

### **LC-MS analysis of oligonucleotides**

The identity of oligonucleotides was verified by LC-MS analysis on an Agilent 6530 accurate mass Q-TOF using the following conditions: buffer A: 100 mM 1,1,1,3,3,3-hexafluoroisopropanol (HFIP) and 9 mM triethylamine (TEA) in LC-MS grade water; buffer B: 100 mM HFIP and 9 mM TEA in LC-MS grade methanol; column, Agilent AdvanceBio oligonucleotides C18; linear gradient 0-40% B 5 min (VP, unconjugated, DIO, trivalent and tetravalent); linear gradient 50-100% B 5 min (DCA, EPA conjugated and Cy3 labeled); temperature, 60°C; flow rate, 0.5 mL/min. LC peaks were monitored at 260 nm and for labeled oligonucleotides at 550 nm. MS parameters: Source, electrospray ionization; ion polarity, negative mode; range, 100-3, 200 m/z; scan rate, 2 spectra/s; capillary voltage, 4,000; fragmentor, 200 V; gas temp, 325°C.

Reagents for deprotection, purification and LC–MS were purchased from Fisher Scientific, Sigma Aldrich and Oakwood Chemicals.

### **A549<sup>ACE2/TMPRSS2</sup> clonal cell line generation and high ACE2-expressing cells generation**

A549 cells (ATCC, cat#CCL-185) were cultured in 1X DMEM medium (Gibco, cat#11965-092) supplemented with 10% FBS (Gibco, cat#10437-028), 1x MEM NEAA (Gibco, cat#11140-050), 100 U/mL of penicillin-streptomycin (Corning, cat#30-002-CI), 1X sodium pyruvate (Gibco, cat#11360-070), and 1X Glutamax (Gibco, cat#35050-061) at 37°C and 5% CO<sub>2</sub>. Cells were fed with fresh media every 2-3 days, and routinely checked for mycoplasma contamination. Lentivirus for ACE2 and TMPRSS2 was produced in HEK293T/17 (ATCC, cat#CRL-11268) with third generation lentiviral packaging plasmids pHDM-G, pHDM-Hgpm2, pHDM-tat1b, and pRC/CMV-rev1b (all from Dr. Maehr's lab) using TransIT-293 transfection reagent (Mirus, Madison, WI, cat#2700) according to the manufacturer's recommendations. Following 48 hours of transfection, viral supernatant was collected, filtered, and stored at -80°C for later use. The A549<sup>ACE2/TMPRSS2</sup> clonal cell line was generated by transducing lentivirus expressing ACE2 and TMPRSS2 genes into the parental A549 cells. Transduced cells were selected with 1 µg/mL puromycin (Invitrogen, cat#A1113803) and screened for high SARS-CoV-2 infection clone as a result of the expression of ACE2 and TMPRSS2. To increase the virus infectivity, the cell populations with a higher ACE2 expression were further sorted using ACE2-specific antibody (AF933, R&D Systems). After puromycin selection, the infectivity significantly increased up to 40~60%.

### **Flow cytometry for lung siRNA distribution analysis**

Collected mouse lung was dissociated to single-cell suspension using gentleMACS C Tubes (Miltenyi Biotec, Bergisch Gladbach, Germany) and a gentleMACS Octo Dissociator (Miltenyi Biotec) with the enzymatic dissociation solution containing 100 µL of Enzyme D, 15 µL of Enzyme A, 62.5 µL of Enzyme P (Miltenyi Biotec, Skeletal Muscle Dissociation Kit), 250 U/mL Collagenase IV (Worthington, Lakewood, NJ), and 2.3 mL of DMEM. Dissociated cells were filtered through a 70-µm strainer and red blood cells were lysed using ACK lysis buffer (155 mM NH<sub>4</sub>Cl, 12 mM NaHCO<sub>3</sub>, 0.1 mM EDTA in distilled water). Lung cells were stained at 4°C for 30 min with the following antibodies: VioGreen-conjugated CD45 antibody (Miltenyi Biotec, clone REA737), APC-conjugated CD31 antibody (Miltenyi Biotec, clone REA784), FITC-conjugated CD326 antibody (Miltenyi Biotec, clone REA977), PE-Vio770-conjugated CD140a antibody (Miltenyi Biotec, clone REA637), and PE-Vio615-conjugated MHCII antibody (Miltenyi Biotec, clone REA813). Cells were then washed twice and resuspended in the flow cytometry buffer containing 1 µM SYTOX Blue (Thermo Fisher Scientific). Stained cells were analyzed using a MACSQuant VYB flow cytometer (Miltenyi Biotec), and data were analyzed using FlowJo software (BD Biosciences, v10.6).

### **Serum cytokine analysis**

The samples and standards were incubated, in duplicates, in a 96-well plate (Corning, Tewksbury, MA) with magnetic beads conjugated to antibodies against desired cytokines for two hours at room temperature with shaking at 500 rpm. Wells were then washed three times with wash buffer, using a magnetic plate washer (Bio-Rad). This step was followed by incubation with detection antibody

for one hour at room temperature with shaking. Following three washes, the samples were incubated with Streptavidin-PE for 30 min at room temperature with shaking. The samples were finally resuspended in 1X reading buffer after three washes. Plates were read in a MAGPIX<sup>®</sup> System instrument (Luminex Corporation). Standard curves were generated, and the levels of each cytokine were calculated using the 4-parameter logistic regression using GraphPad Prism 8.

### **Mouse-adapted SARS-CoV-2 infection and treatment studies**

The *in vivo* infection studies were performed in an animal biosafety level 3 (ABSL3) facility in at UMass Chan Medical School. The study procedures were conducted with approval by the IACUC at UMass Chan Medical School. A total of 64 BALB/c mice (Jackson Laboratory, 8 week old females) were divided into 7 groups: group 1: PBS-treated, infected control (n=9); group 2: remdesivir-treated, infected (n=9); group 3: siRNA\_NTC, infected (n=11); group 4: siRNA\_orf7a\_27751, infected (n=11); group 5: siRNA\_N\_29293, infected (n=11); group 6 1:1 mix of orf7a\_27751 and N\_29293, infected (n=11); group 7: uninfected, untreated control mice (n=3). Mice were anesthetized and inoculated intranasally with  $1 \times 10^4$  plaque forming units of SARS-CoV-2 MA10. Mouse-adapted MA10 virus was obtained from BEI Resources (NR-55329). Remdesivir (VEKLURY) was purchased from the UMass Memorial Medical Center pharmacy and reconstituted in water for intraperitoneal administration. Mice were dosed twice daily (50 mg/kg/dose) x 4 days beginning at one day pre-infection. For siRNA, mice received intranasal injections (left nostril) of 20 nmol of siRNA at days -7, -4 and -1 before infection on day 0. Mice were weighed daily starting until end of study to measure infection-associated weight loss. At 3 days post-infection, mice were euthanized. The right lungs were collected and placed in 1 mL PBS with zirconium oxide beads and stored at  $-80^{\circ}\text{C}$  for subsequent evaluation of lung virus titers. The left lungs were fixed in 10% neutral-formalin buffer at  $4^{\circ}\text{C}$  overnight for histopathology. For virus titer assays, lung homogenates were spun down at  $10,000 \times g$  for 5 min at  $4^{\circ}\text{C}$ . Supernatants were aliquoted in 500  $\mu\text{L}$  and stored at  $-80^{\circ}\text{C}$  until plaque assay. 200,000 Vero E6 cells per well were plated on a 12-well plate. The monolayer was washed once with PBS. Serial  $\log_{10}$  diluted virus samples (320  $\mu\text{L}$ ) were placed in each well. The plate was incubated for 1 hour with rocking every 15 min to prevent drying of the cells. After adsorption, 2 mL carboxymethylcellulose overlay (1x MEM, 2% FBS, 2% carboxymethylcellulose) was placed in each well. The plate was incubated at  $37^{\circ}\text{C}$  for 3 days, after which 4% paraformaldehyde was added to each well and cells were stained with 1% crystal violet in 20% ethanol. For immunohistochemistry staining of SARS-CoV-2 nucleocapsid protein, sections were obtained from formalin-fixed, paraffin-embedded lung tissue and immunostained with SARS-CoV-2 nucleocapsid antibody (Sinobiological, cat#40143-MM05, at dilution 1:500 in 3% BSA) by the UMass Chan Medical School Morphology Core Facility.







|             |              |                   |                                                                                         |
|-------------|--------------|-------------------|-----------------------------------------------------------------------------------------|
| pp1a_417    | pp1a         | ACUUCUACUUAAGCCAC | (1A)#(1C)#(1T)#(dT)#(d5C)#(dT)#(dA)#(d5C)#(dT)#(dA)#(dA)#(dG)#(d5C)#(1C)#(1A)#(1C)      |
| pp1a_2293   | pp1a         | AAGCUJAAAGAAUGUC  | (1A)#(1A)#(1G)#(d5C)#(dT)#(dT)#(dA)#(dA)#(dA)#(dG)#(dA)#(dA)#(dT)#(1G)#(1T)#(1C)        |
| pp1a_8745   | pp1a         | GCAUGUUGUUAAGCAA  | (1G)#(1C)#(1A)#(dT)#(dG)#(dT)#(dT)#(dT)#(dG)#(dT)#(dT)#(dA)#(dG)#(1C)#(1A)#(1A)         |
| pp1a_8747   | pp1a         | CAGCAUGUUGUUAAGC  | (1C)#(1A)#(1G)#(d5C)#(dA)#(dT)#(dG)#(dT)#(dT)#(dT)#(dT)#(dG)#(dT)#(dT)#(1A)#(1G)#(1C)   |
| pp1a_9680   | pp1a         | AAGCAAUUGUUAUCCA  | (1A)#(1A)#(1G)#(d5C)#(dA)#(dA)#(dT)#(dT)#(dG)#(dT)#(dT)#(dA)#(dT)#(1C)#(1C)#(1A)        |
| pp1a_9681   | pp1a         | UAAGCAAUUGUUAUCC  | (1T)#(1A)#(1A)#(dG)#(d5C)#(dA)#(dA)#(dT)#(dT)#(dG)#(dT)#(dT)#(dA)#(1T)#(1C)#(1C)        |
| pp1ab_14361 | pp1ab        | GUUUGCACAAUGCAGA  | (1G)#(1T)#(1T)#(dT)#(dG)#(d5C)#(dA)#(d5C)#(dA)#(dA)#(dT)#(dG)#(d5C)#(1A)#(1G)#(1A)      |
| pp1ab_17111 | pp1ab        | AGAGCUAGGCCAAUAG  | (1A)#(1G)#(1A)#(dG)#(d5C)#(dT)#(dT)#(dA)#(dG)#(dG)#(d5C)#(dA)#(dA)#(1T)#(1A)#(1G)       |
| pp1ab_18027 | pp1ab        | AGCUUUGUUAAGUJGCC | (1A)#(1G)#(1C)#(dT)#(dT)#(dG)#(dT)#(dA)#(dA)#(dA)#(dG)#(dT)#(dT)#(1G)#(1C)#(1C)         |
| pp1ab_20893 | pp1ab        | CAGCUUACUGGUGC    | (1C)#(1A)#(1G)#(d5C)#(dT)#(dG)#(dT)#(dA)#(d5C)#(d5C)#(dT)#(dG)#(dG)#(1T)#(1G)#(1C)      |
| pp1ab_20894 | pp1ab        | ACAGCUUACUGGUG    | (1A)#(1C)#(1A)#(dG)#(d5C)#(dT)#(dG)#(dT)#(dA)#(d5C)#(d5C)#(dT)#(dG)#(1G)#(1T)#(1G)      |
| pp1ab_20895 | pp1ab        | AACAGCUGUACUGGU   | (1A)#(1A)#(1C)#(dA)#(dG)#(d5C)#(dT)#(dG)#(dT)#(dT)#(dA)#(d5C)#(d5C)#(dT)#(1G)#(1G)#(1T) |
| S_22224     | spike        | AAUGGUUCUAAAGCCG  | (1A)#(1A)#(1T)#(dG)#(dG)#(dT)#(dT)#(d5C)#(dT)#(dA)#(dA)#(dG)#(1C)#(1C)#(1G)             |
| S_22225     | spike        | CAAUGGUUCUAAAGCC  | (1C)#(1A)#(1A)#(dT)#(dG)#(dG)#(dT)#(dT)#(d5C)#(dT)#(dA)#(dA)#(dA)#(1G)#(1C)#(1C)        |
| S_23177     | spike        | UGAAGUUGAAAUJGAC  | (1T)#(1G)#(1A)#(dA)#(dG)#(dT)#(dT)#(dG)#(dA)#(dA)#(dA)#(dT)#(dT)#(1G)#(1A)#(1C)         |
| S_23778     | spike        | CCACAAUUGUACAUJG  | (1C)#(1C)#(1A)#(d5C)#(dA)#(dA)#(dA)#(dT)#(dG)#(dT)#(dA)#(d5C)#(dA)#(1T)#(1T)#(1G)       |
| S_25376     | spike        | AGUUCGUUUUAGUGUA  | (1A)#(1G)#(1T)#(dT)#(d5C)#(dG)#(dT)#(dT)#(dT)#(dT)#(dA)#(dT)#(dG)#(dT)#(1G)#(1T)#(1A)   |
| S_25378     | spike        | UAAGUUCGUUUUAGUG  | (1T)#(1A)#(1A)#(dG)#(dT)#(dT)#(d5C)#(dG)#(dT)#(dT)#(dT)#(dA)#(dT)#(1G)#(1T)#(1G)        |
| 3a_25719    | orf3a        | GAAUGAGCUAAAGCA   | (1G)#(1A)#(1A)#(dG)#(dT)#(dA)#(dG)#(dA)#(d5C)#(dT)#(dA)#(dA)#(dA)#(1G)#(1C)#(1A)        |
| 3a_25914    | orf3a        | AAUAGGACUUGUUGUG  | (1A)#(1A)#(1T)#(dA)#(dG)#(dG)#(dA)#(d5C)#(dT)#(dT)#(dG)#(dT)#(dT)#(1G)#(1T)#(1G)        |
| 3a_25993    | orf3a        | AACUGUGUAAUJACAC  | (1A)#(1A)#(1C)#(dT)#(dG)#(dT)#(dG)#(dT)#(dA)#(dA)#(dT)#(dA)#(d5C)#(1A)#(1A)#(1C)        |
| 3a_26019    | orf3a        | CAGCUGGUAAUJAGUC  | (1C)#(1A)#(1G)#(d5C)#(dT)#(dG)#(dG)#(dT)#(dA)#(dA)#(dT)#(dA)#(dG)#(1T)#(1C)#(1T)        |
| 3a_26020    | orf3a        | ACAGCUGUAAUJAGUC  | (1A)#(1C)#(1A)#(dG)#(d5C)#(dT)#(dG)#(dG)#(dT)#(dA)#(dA)#(dT)#(dA)#(1G)#(1T)#(1C)        |
| 3a_26021    | orf3a        | UACAGCUGGUAAUJAGU | (1T)#(1A)#(1C)#(dA)#(dG)#(d5C)#(dT)#(dG)#(dG)#(dT)#(dA)#(dA)#(dT)#(1A)#(1G)#(1T)        |
| E_26260     | envelope     | UACCUUGUCUUCUCGA  | (1T)#(1A)#(1C)#(d5C)#(dT)#(dG)#(dT)#(d5C)#(dT)#(d5C)#(dT)#(d5C)#(1C)#(1G)#(1A)          |
| E_26265     | envelope     | UAACGUACUGUCUCU   | (1T)#(1A)#(1A)#(d5C)#(dG)#(dT)#(dA)#(d5C)#(d5C)#(dT)#(dG)#(dT)#(d5C)#(1T)#(1C)#(1T)     |
| E_26370     | envelope     | AACAUAUUGCAGCAG   | (1A)#(1A)#(1C)#(dA)#(dA)#(dT)#(dA)#(dT)#(dT)#(dG)#(d5C)#(dA)#(dG)#(1C)#(1A)#(1G)        |
| E_26371     | envelope     | UAACAUAUUGCAGCA   | (1T)#(1A)#(1A)#(d5C)#(dA)#(dA)#(dT)#(dA)#(dT)#(dT)#(dG)#(d5C)#(dA)#(1G)#(1C)#(1A)       |
| E_26374     | envelope     | CGUUAACAUAUJGCA   | (1C)#(1G)#(1T)#(dT)#(dA)#(dA)#(d5C)#(dA)#(dA)#(dT)#(dA)#(dT)#(1G)#(1C)#(1A)             |
| E_26378     | envelope     | CUCACGUUAACAUAU   | (1C)#(1T)#(1C)#(dA)#(d5C)#(dG)#(dT)#(dT)#(dA)#(dA)#(d5C)#(dA)#(dA)#(1T)#(1A)#(1T)       |
| M_26582     | membrane     | ACUUAUUCUAGGUUC   | (1A)#(1C)#(1C)#(dT)#(dT)#(dT)#(dA)#(d5C)#(dT)#(dA)#(dG)#(1T)#(1T)#(1C)                  |
| M_26584     | membrane     | AAACUUAUUCUAGGU   | (1A)#(1A)#(1A)#(d5C)#(d5C)#(dT)#(dA)#(dT)#(dT)#(dA)#(d5C)#(dT)#(dA)#(1G)#(1G)#(1T)      |
| M_26605     | membrane     | CAAAUCUAGUAAAGGA  | (1C)#(1A)#(1A)#(dA)#(dT)#(d5C)#(d5C)#(dA)#(dT)#(dG)#(dT)#(dA)#(dA)#(1G)#(1G)#(1A)       |
| M_26606     | membrane     | ACAAAUCCUAGUAAAG  | (1A)#(1C)#(1A)#(dA)#(dA)#(dT)#(d5C)#(d5C)#(dA)#(dT)#(dG)#(dT)#(dA)#(1A)#(1G)#(1G)       |
| M_26628     | membrane     | UGGCAUAGGCAAAUUG  | (1T)#(1G)#(1G)#(d5C)#(dA)#(dT)#(dA)#(dG)#(dG)#(d5C)#(dA)#(dA)#(dA)#(1T)#(1T)#(1G)       |
| M_26720     | membrane     | GUAAACAGCAGCAAGC  | (1G)#(1T)#(1A)#(dA)#(dA)#(d5C)#(dA)#(dG)#(d5C)#(dA)#(dG)#(d5C)#(dA)#(1A)#(1G)#(1C)      |
| 7a_27458    | orf7a        | GUACCUCUAAACACAC  | (1G)#(1T)#(1A)#(d5C)#(d5C)#(dT)#(d5C)#(dT)#(dA)#(dA)#(d5C)#(dA)#(d5C)#(1A)#(1C)#(1T)    |
| 7a_27553    | orf7a        | AGCAAGUCAGUGCAAA  | (1A)#(1G)#(1C)#(dA)#(dA)#(dG)#(dT)#(d5C)#(dA)#(dG)#(dT)#(dG)#(d5C)#(1A)#(1A)#(1A)       |
| 7a_27565    | orf7a        | AUUGAGUGCUAAAGCA  | (1A)#(1T)#(1T)#(dG)#(dA)#(dG)#(dT)#(dG)#(d5C)#(dT)#(dA)#(dA)#(dA)#(1G)#(1C)#(1A)        |
| 7a_27569    | orf7a        | GCAAAUJGAGUGCUAA  | (1G)#(1C)#(1A)#(dA)#(dA)#(dT)#(dT)#(dG)#(dA)#(dG)#(dT)#(dG)#(d5C)#(1T)#(1A)#(1A)        |
| 7a_27705    | orf7a        | AAACACUUAUUGCCGCA | (1A)#(1A)#(1A)#(d5C)#(dA)#(d5C)#(dT)#(dA)#(dT)#(dT)#(dG)#(d5C)#(d5C)#(1G)#(1C)#(1A)     |
| 7a_27724    | orf7a        | GUGUGAAGCAAAGUGU  | (1G)#(1T)#(1G)#(dT)#(dG)#(dA)#(dA)#(dG)#(d5C)#(dA)#(dA)#(dA)#(dG)#(1T)#(1G)#(1T)        |
| 8b_28002    | orf8b        | AGAAGUGAAUJGGACA  | (1A)#(1G)#(1A)#(dA)#(dG)#(dT)#(dG)#(dA)#(dA)#(dT)#(dA)#(dG)#(dG)#(1A)#(1C)#(1A)         |
| 8b_28092    | orf8b        | GAAUGGGUGAUUJAGA  | (1G)#(1A)#(1A)#(dT)#(dG)#(dG)#(dG)#(dT)#(dG)#(dA)#(dT)#(dT)#(dT)#(1A)#(1G)#(1A)         |
| 8b_28093    | orf8b        | UGAAUJGGUGAUUJAG  | (1T)#(1G)#(1A)#(dA)#(dT)#(dG)#(dG)#(dG)#(dT)#(dG)#(dA)#(dT)#(dT)#(1T)#(1A)#(1G)         |
| 8b_28122    | orf8b        | AAACUGUUAUJAUACC  | (1A)#(1A)#(1A)#(d5C)#(dT)#(dG)#(dT)#(dA)#(dT)#(dA)#(dA)#(dT)#(dT)#(1A)#(1C)#(1C)        |
| 8b_28165    | orf8b        | CCCAAUJAGGUJCCU   | (1C)#(1C)#(1C)#(dA)#(dA)#(dT)#(dT)#(dT)#(dA)#(dG)#(dG)#(dT)#(dT)#(1C)#(1C)#(1T)         |
| N_28656     | nucleocapsid | CCCAAUJAGUAGCCGU  | (1A)#(1C)#(1C)#(d5C)#(dA)#(dT)#(dA)#(dT)#(dG)#(dA)#(dT)#(dG)#(d5C)#(1C)#(1G)#(1T)       |
| N_28946     | nucleocapsid | GCUGGUUCAAUCUGUC  | (1G)#(1C)#(1T)#(dG)#(dG)#(dT)#(dT)#(d5C)#(dA)#(dA)#(dT)#(d5C)#(dT)#(1G)#(1T)#(1C)       |
| N_28949     | nucleocapsid | CAGCUGGUUCAAUCU   | (1C)#(1A)#(1A)#(dG)#(d5C)#(dT)#(dG)#(dG)#(dT)#(dT)#(d5C)#(dA)#(dA)#(1T)#(1C)#(1T)       |
| N_29141     | nucleocapsid | CUUUGUCUAGUJAUUC  | (1C)#(1T)#(1T)#(dG)#(dT)#(d5C)#(dT)#(dG)#(dA)#(dT)#(dT)#(dA)#(dG)#(1T)#(1T)#(1C)        |
| N_29142     | nucleocapsid | CCUUGUCUAGUJAGUU  | (1C)#(1C)#(1T)#(dT)#(dG)#(dT)#(d5C)#(dT)#(dG)#(dA)#(dT)#(dT)#(dA)#(1G)#(1T)#(1T)        |
| N_29311     | nucleocapsid | AAUGACUJAGUUCUUG  | (1A)#(1A)#(1T)#(dG)#(dA)#(d5C)#(dT)#(dT)#(dG)#(dA)#(dT)#(d5C)#(dT)#(1T)#(1T)#(1G)       |
| NTC         | n/a          | n/a               | (1A)#(1T)#(1T)#(dT)#(dT)#(dA)#(dT)#(dT)#(dC)#(dG)#(dG)#(dA)#(1G)#(1C)#(1T)              |

### siRNA used for mouse tissue distribution and efficacy studies

| siRNA Name             | Target gene | Target sequence       |
|------------------------|-------------|-----------------------|
| HTT10150 - Monovalent  | huntingtin  | UAUAUCAGUAAAAGAGAUUAA |
| HTT10150 - Divalent    | huntingtin  | UAUAUCAGUAAAAGAGAUUAA |
| HTT10150 - Trivalent   | huntingtin  | UAUAUCAGUAAAAGAGAUUAA |
| HTT10150 - Tetravalent | huntingtin  | UAUAUCAGUAAAAGAGAUUAA |

### siRNA guide strand sequence

V(mU)#(FU)#(mA)(FA)(mU)(FC)(mU)(FC)(mU)(FU)(mU)(FA)(mC)#(FU)#(mG)#(FA)#(mU)#(FA)#(mU)#(FA)  
V(mU)#(FU)#(mA)(FA)(mU)(FC)(mU)(FC)(mU)(FU)(mU)(FA)(mC)#(FU)#(mG)#(FA)#(mU)#(FA)#(mU)#(FA)  
V(mU)#(FU)#(mA)(FA)(mU)(FC)(mU)(FC)(mU)(FU)(mU)(FA)(mC)#(FU)#(mG)#(FA)#(mU)#(FA)#(mU)#(FA)  
V(mU)#(FU)#(mA)(FA)(mU)(FC)(mU)(FC)(mU)(FU)(mU)(FA)(mC)#(FU)#(mG)#(FA)#(mU)#(FA)#(mU)#(FA)

### siRNA passenger strand sequence

Cy3-(FC)#(mA)#(FG)(mU)(FA)(mA)(FA)(mG)(FA)(mG)(FA)(mU)(FU)#(mU)#(FA)  
Cy3-(FC)#(mA)#(FG)(mU)(FA)(mA)(FA)(mG)(FA)(mG)(FA)(mU)(FU)#(mU)#(FA)-D10  
Cy3-(FC)#(mA)#(FG)(mU)(FA)(mA)(FA)(mG)(FA)(mG)(FA)(mU)(FU)#(mU)#(FA)-Tri  
Cy3-(FC)#(mA)#(FG)(mU)(FA)(mA)(FA)(mG)(FA)(mG)(FA)(mU)(FU)#(mU)#(FA)-Tetra

|                    |            |                      |                                                                                                |                                                                                  |
|--------------------|------------|----------------------|------------------------------------------------------------------------------------------------|----------------------------------------------------------------------------------|
| HTT10150 - DCA     | huntingtin | UAUAUCAGUAAAGAGAUUAA | V(mU)#(fU)#(mA)(fA)(mU)(fC)(mU)(fC)(mU)(fU)(mU)(fA)(mC)#(fU)#(mG)#(fA)#(mU)#(fA)#(mU)#(fA)     | Cy3-(fC)#(mA)#(fG)(mU)(fA)(mA)(fA)(mG)(fA)(mG)(fA)(mU)(fU)#(mA)#(fA)(dT)(dT)-DCA |
| HTT10150 - EPA     | huntingtin | UAUAUCAGUAAAGAGAUUAA | V(mU)#(fU)#(mA)(fA)(mU)(fC)(mU)(fC)(mU)(fU)(mU)(fA)(mC)#(fU)#(mG)#(fA)#(mU)#(fA)#(mU)#(fA)     | Cy3-(fC)#(mA)#(fG)(mU)(fA)(mA)(fA)(mG)(fA)(mG)(fA)(mU)(fU)#(mA)#(fA)(dT)(dT)-EPA |
| CD47 - Monovalent  | cd47       | CAUGUCACAUAAAUGAUUAC | V(mU)#(fU)#(mA)(fA)(fU)(fC)(mA)(fU)(mU)(fU)(mA)(fU)(mG)(fU)#(mG)#(fA)#(mC)#(mU)#(mU)#(mU)#(mU) | (mU)#(mC)#(mA)(fC)(mA)(fU)(mA)(fA)(mA)(fU)(mG)(mA)(mU)(fU)#(mA)#(mA)             |
| CD47 - Divalent    | cd47       | CAUGUCACAUAAAUGAUUAC | V(mU)#(fU)#(mA)(fA)(fU)(fC)(mA)(fU)(mU)(fU)(mA)(fU)(mG)(fU)#(mG)#(fA)#(mC)#(mU)#(mU)#(mU)#(mU) | (mU)#(mC)#(mA)(fC)(mA)(fU)(mA)(fA)(mA)(fU)(mG)(mA)(mU)(fU)#(mA)#(mA)-DIO         |
| CD47 - Trivalent   | cd47       | CAUGUCACAUAAAUGAUUAC | V(mU)#(fU)#(mA)(fA)(fU)(fC)(mA)(fU)(mU)(fU)(mA)(fU)(mG)(fU)#(mG)#(fA)#(mC)#(mU)#(mU)#(mU)#(mU) | (mU)#(mC)#(mA)(fC)(mA)(fU)(mA)(fA)(mA)(fU)(mG)(mA)(mU)(fU)#(mA)#(mA)-Tri         |
| CD47 - Tetravalent | cd47       | CAUGUCACAUAAAUGAUUAC | V(mU)#(fU)#(mA)(fA)(fU)(fC)(mA)(fU)(mU)(fU)(mA)(fU)(mG)(fU)#(mG)#(fA)#(mC)#(mU)#(mU)#(mU)#(mU) | (mU)#(mC)#(mA)(fC)(mA)(fU)(mA)(fA)(mA)(fU)(mG)(mA)(mU)(fU)#(mA)#(mA)-Tetra       |
| NTC - Divalent     | n/a        | n/a                  | V(mU)#(fA)#(mA)(fU)(fC)(fG)(mU)(fA)(mU)(fU)(fG)(mU)#(fC)#(mA)#(fA)#(mU)#(mC)#(mA)#(fU)         | (mU)#(mG)#(fA)(mC)(fA)(mA)(fA)(mU)(fA)(mC)(mG)(mA)(fU)#(mU)#(mA)-DIO             |

### siRNA used for mouse tissue distribution and efficacy studies

| siRNA Name             | Target gene  | Target sequence      |
|------------------------|--------------|----------------------|
| pp1a_2290 - Divalent   | pp1a         | UCAGACAUUCUUUAAGCUUG |
| pp1ab_18571 - Divalent | pp1ab        | UCUGACAGAGUCGUUUUUGU |
| orf7a_27751 - Divalent | orf7a        | ACAGAAUGAUUGAACUUUCA |
| N_29293 - Divalent     | nucleocapsid | UGACAAAGAUCCAAAUUUCA |
| NTC - Divalent         | n/a          | n/a                  |

### siRNA guide strand sequence

|                                                                                           |
|-------------------------------------------------------------------------------------------|
| V(mU)#(fA)#(mA)(fG)(fC)(fU)(mU)(fA)(mA)(fA)(mG)(fA)(mA)(fU)#(mG)#(fU)#(mC)#(mU)#(mU)#(mU) |
| V(mU)#(fC)#(mA)(fA)(fU)(mA)(fC)(mG)(fA)(mC)(fU)(mC)(fU)#(mG)#(fU)#(mC)#(mU)#(mU)#(mU)     |
| V(mU)#(fG)#(mA)(fA)(fA)(fG)(mU)(fU)(mC)(fA)(mA)(fU)(mC)(fA)#(mU)#(fU)#(mC)#(mU)#(mU)#(mU) |
| V(mU)#(fG)#(mA)(fA)(fA)(fU)(mU)(fU)(mG)(fG)(mA)(fU)(mC)(fU)#(mU)#(fU)#(mG)#(mU)#(mU)#(mU) |
| V(mU)#(fA)#(mA)(fU)(fC)(fG)(mU)(fA)(mU)(fU)(fG)(mU)#(fC)#(mA)#(fA)#(mU)#(mC)#(mA)#(fU)    |

### siRNA passenger strand sequence

|                                                                          |
|--------------------------------------------------------------------------|
| (mA)#(mC)#(mA)(fU)(mU)(fC)(fU)(mU)(fA)(mA)(mG)(mC)(fU)#(mU)#(mA)-DIO     |
| (mA)#(mC)#(mA)(fG)(mA)(fG)(mU)(fC)(mG)(fU)(mA)(mU)(mU)(fU)#(mG)#(mA)-DIO |
| (mA)#(mA)#(mU)(fG)(mA)(fU)(mU)(fG)(mA)(fA)(mC)(mU)(mU)(fU)#(mC)#(mA)-DIO |
| (mA)#(mA)#(mA)(fG)(mA)(fU)(mC)(fC)(mA)(fA)(mA)(mU)(mU)(fU)#(mC)#(mA)-DIO |
| (mU)#(mG)#(fA)(mC)(fA)(mA)(fA)(mU)(fA)(mC)(mG)(mA)(fU)#(mU)#(mA)-DIO     |

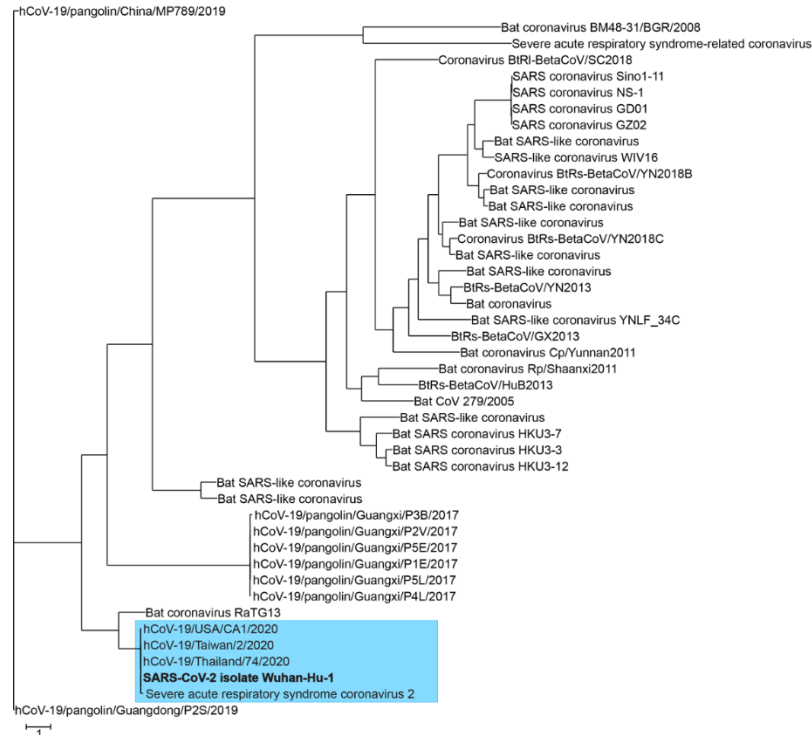

**Supporting Fig. 1 | SARS-CoV-2 Family Homology.** A maximum-likelihood phylogenetic tree of SARS-CoV-2 and coronaviruses most closely related to SARS-CoV-2 were generated with Augur Tree. Genomic sequences were aligned to five representative SARS-CoV-2 genomes from infected patient isolates (blue box; bold, The SARS-CoV-2 Wuhan-Hu-1 target genomic transcript). Scale bar for branch length indicates substitutions per site.

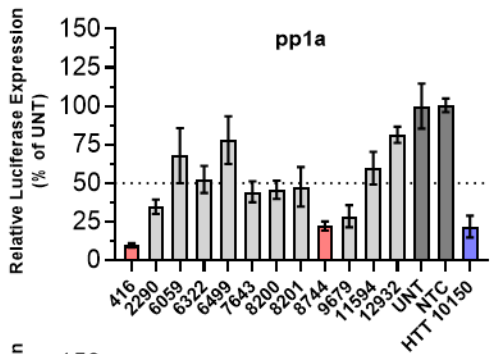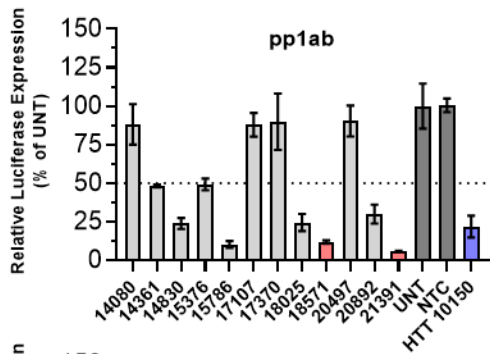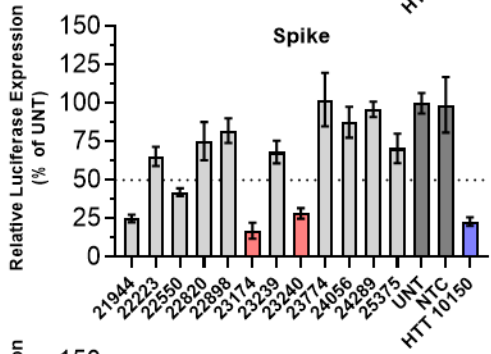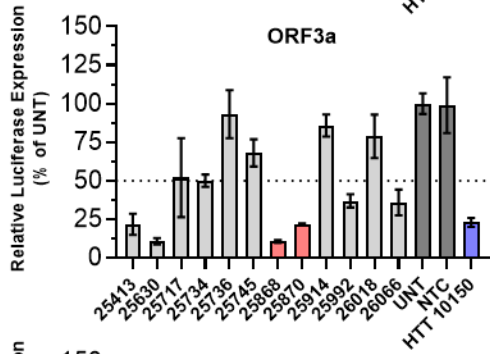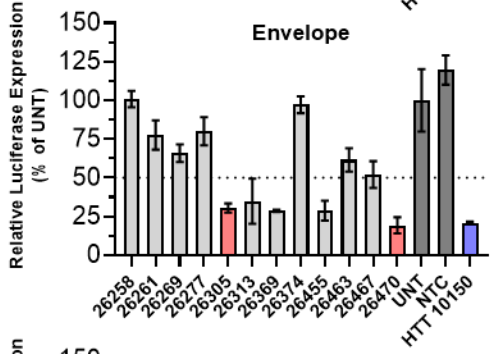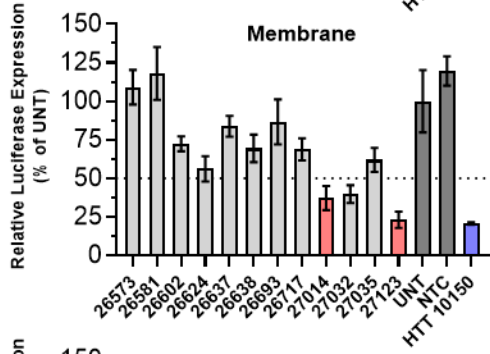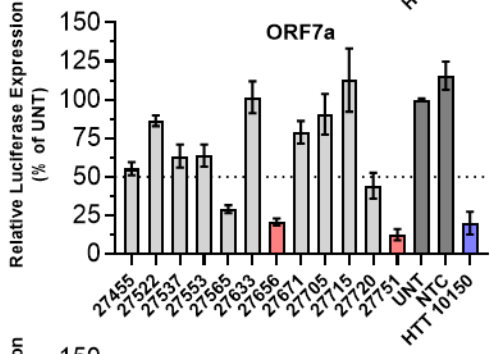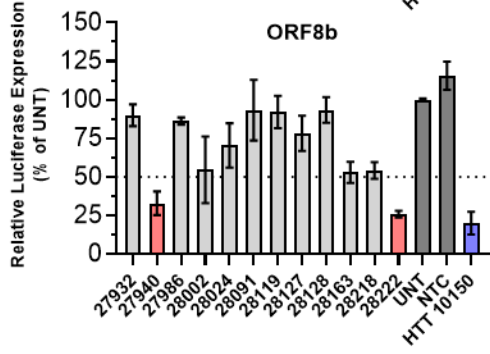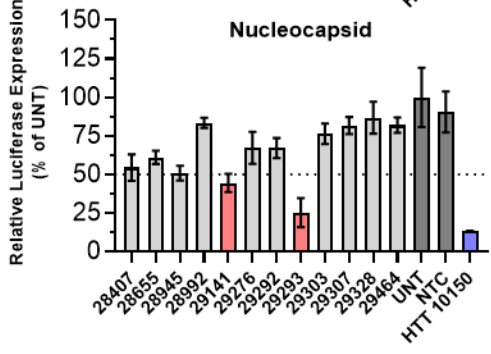

**Supporting Fig. 2 | In Vitro Reporter Assays testing siRNAs for Silencing Activity (matched to Fig. 1e).** Percent expression of SARS-CoV-2 reporter in HeLa cells 72 hours after uptake of siRNA (n=3; 1.5  $\mu$ M). Reporter expressions were assayed using the psiCHECK-2 reporter system targeting 9 genomic regions of SARS-CoV-2. Data presented relative to UNT (mean  $\pm$  SD of independent biological replicates; top hit: red, UNT/NTC: dark grey, positive control siRNA: blue). Target regions of SARS-CoV-2 are indicated in each graph. The dotted lines indicate 50% silencing. NTC, non-targeting control; UNT, untreated control.

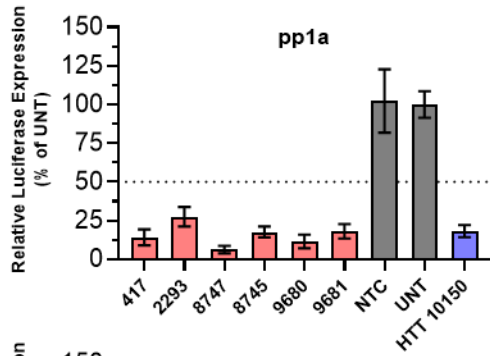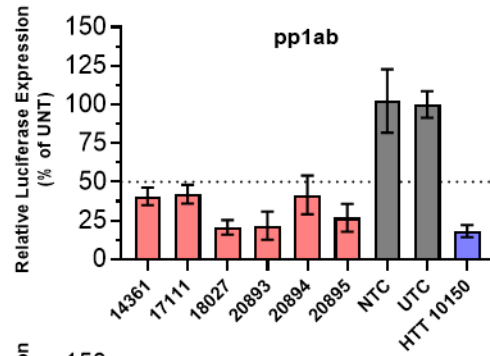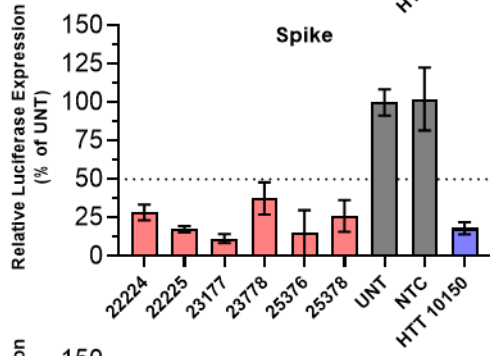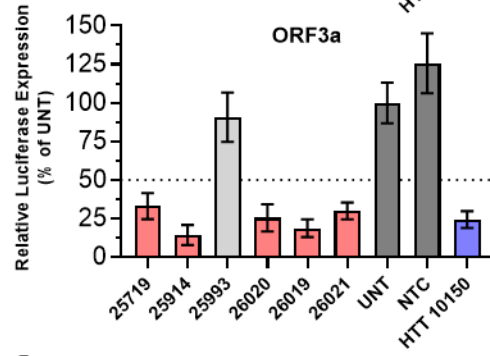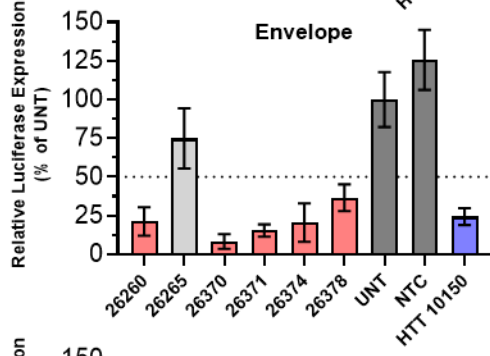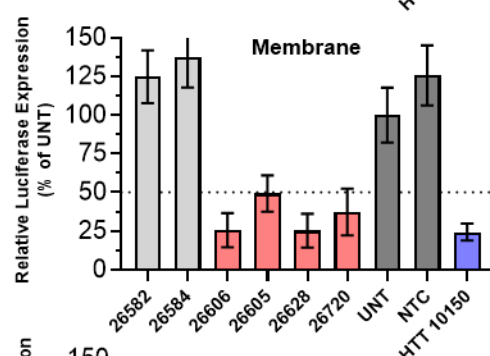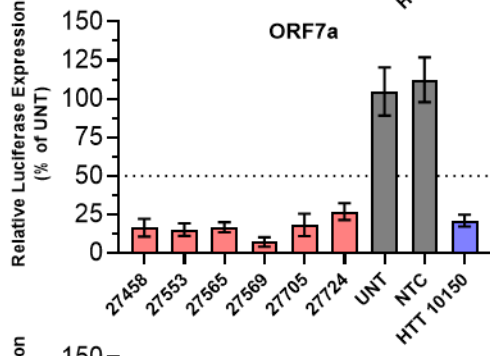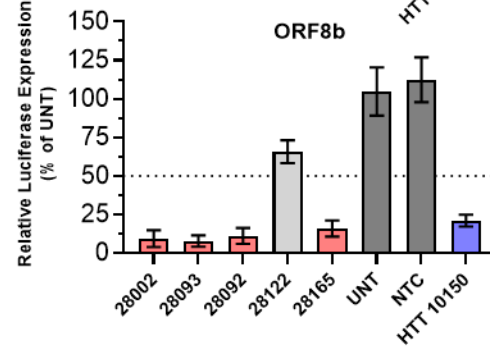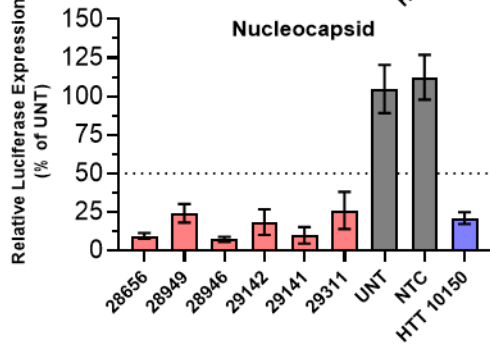

**Supporting Fig. 3 | In Vitro Reporter Assays testing ASOs for Silencing Activity.** Percent expression of SARS-CoV-2 reporter in HeLa cells 72 hours after uptake of ASO (n=3; 1.5  $\mu$ M). Reporter expressions were assayed using the psiCHECK-2 reporter system targeting 9 genomic regions of SARS-CoV-2. Data presented relative to UNT (mean  $\pm$  SD of independent biological replicates; top hit: red, UNT/NTC: dark grey, positive control siRNA: blue). Target regions of SARS-CoV-2 are indicated in each graph. The dotted lines indicate 50% silencing. NTC, non-targeting control; UNT, untreated control.



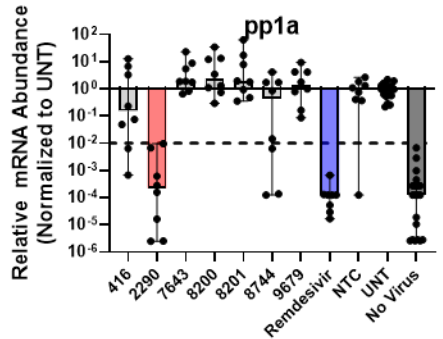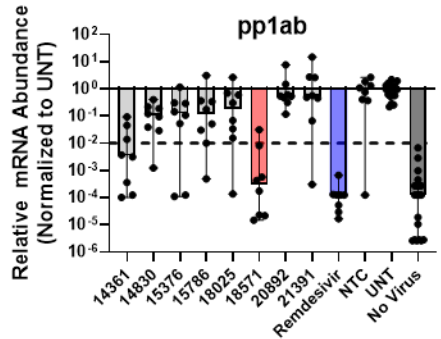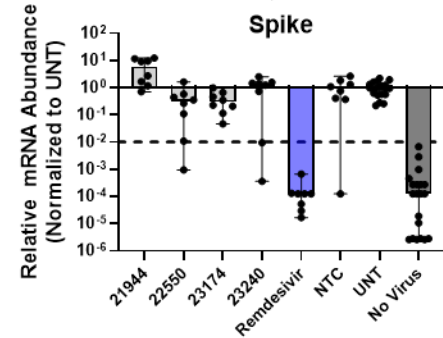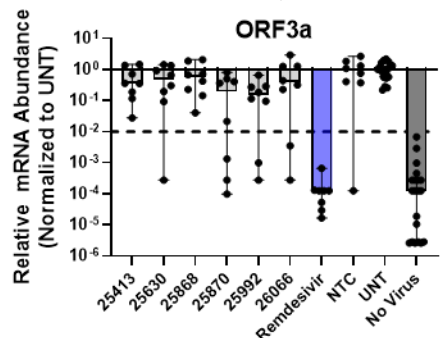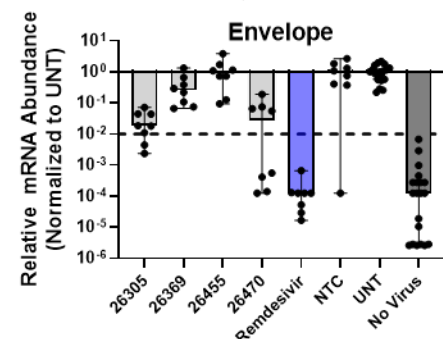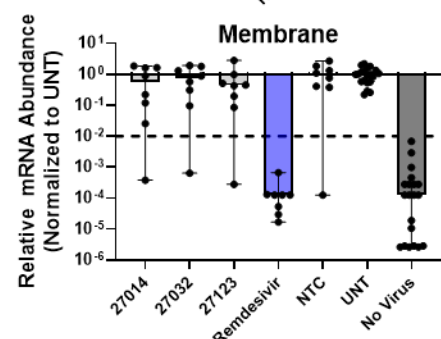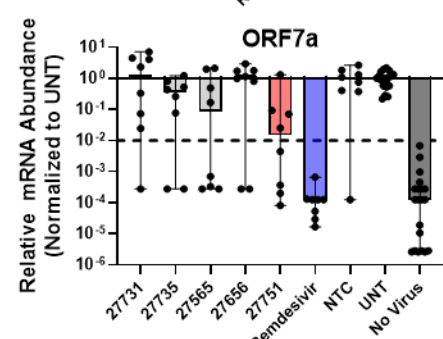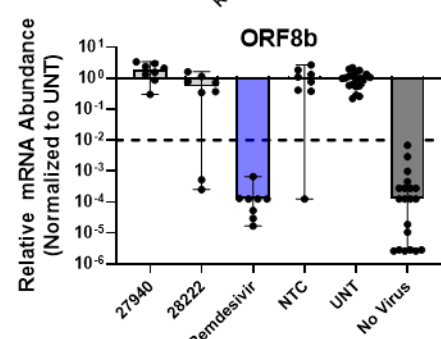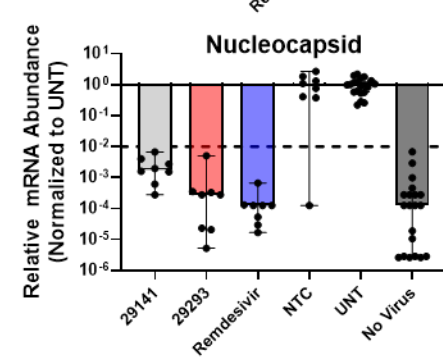

**Supporting Fig. 4 | SARS-CoV-2 infection screen identifies target sites susceptible to RNAi based modulation (matched to Fig. 2a).** Relative abundance of viral mRNA in supernatant of A549<sup>ACE2/TMPRSS2</sup> cells 48 hours post-infection of SARS-CoV-2 with MOI 0.1. siRNAs were transfected 36 hours prior to the infection (siRNA: n=8, controls: n=20; 10 nM). Remdesivir with 5  $\mu$ M was used as a positive control for antiviral activity. No virus represents cells which were not infected with virus. Abundance of viral mRNA was measured by qRT-PCR. Data presented relative to UNT (median  $\pm$  95% CI of independent biological replicates; top hit: red, NTC/UNT/no virus: dark grey, remdesivir: blue). Dotted line indicates 99% reduction in mRNA abundance. MOI, multiplicity of infection; NTC, non-targeting control; UNT, untreated control.

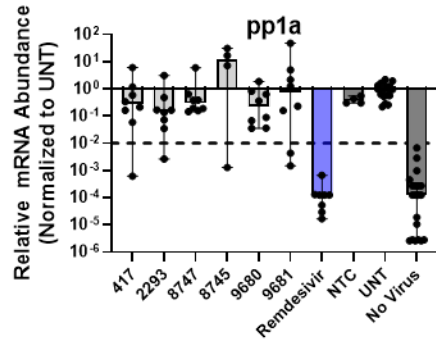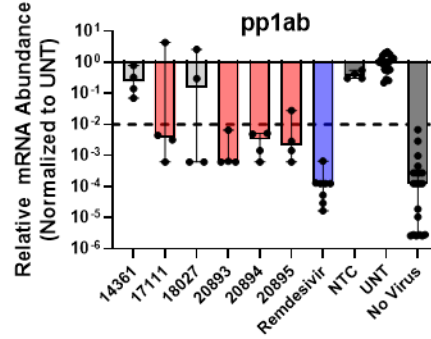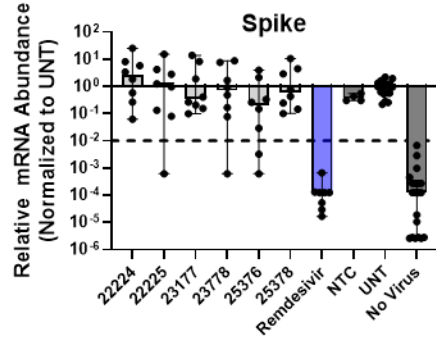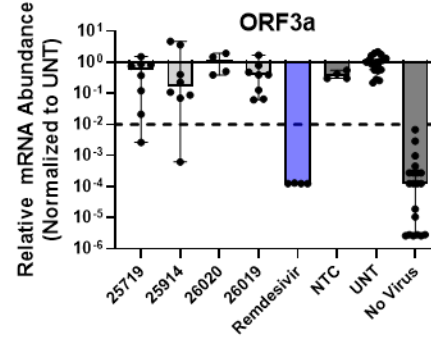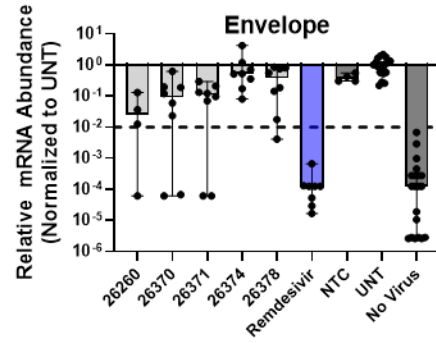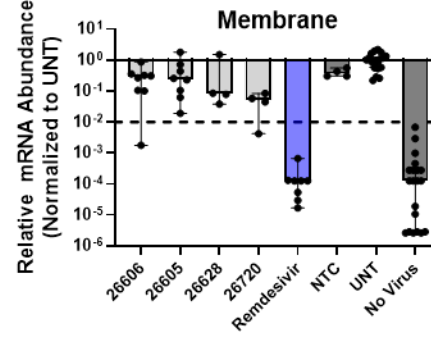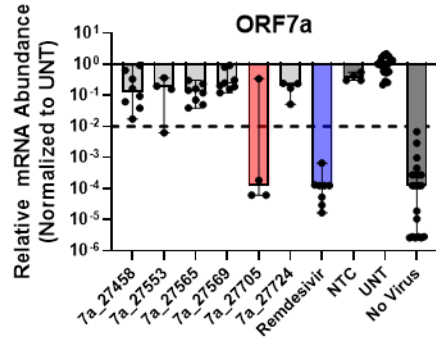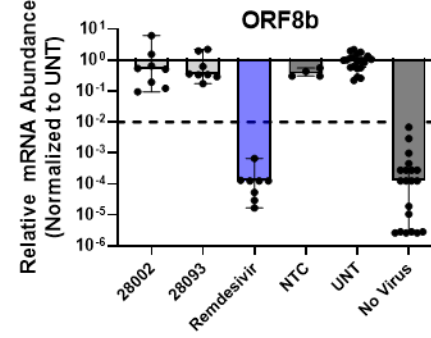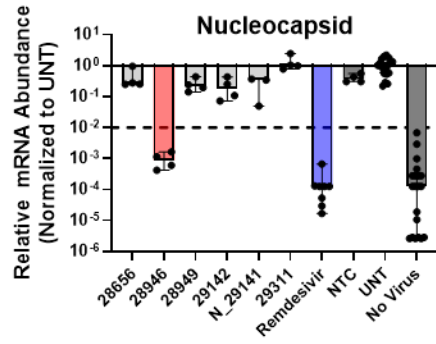

**Supporting Fig. 5 | SARS-CoV-2 infection screen identifies target sites susceptible to ASO based modulation.** Relative abundance of viral mRNA in supernatant of A549<sup>ACE2/TMPRSS2</sup> cells 48 h post-infection of SARS-CoV-2 with MOI 0.1. ASOs were transfected 36 hours prior to the infection (ASO: n=8, controls: n=20; 25 nM). Remdesivir with 5  $\mu$ M was used as a positive control for antiviral activity. No virus represents cells which were not infected with virus. Abundance of viral mRNA was measured by qRT-PCR. Data presented relative to UNT (median  $\pm$  95% CI of independent biological replicates; top hit: red, NTC/UNT/no virus: dark grey, remdesivir: blue). Dotted line indicates 99% reduction in mRNA abundance. MOI, multiplicity of infection; NTC, non-targeting control; UNT, untreated control.

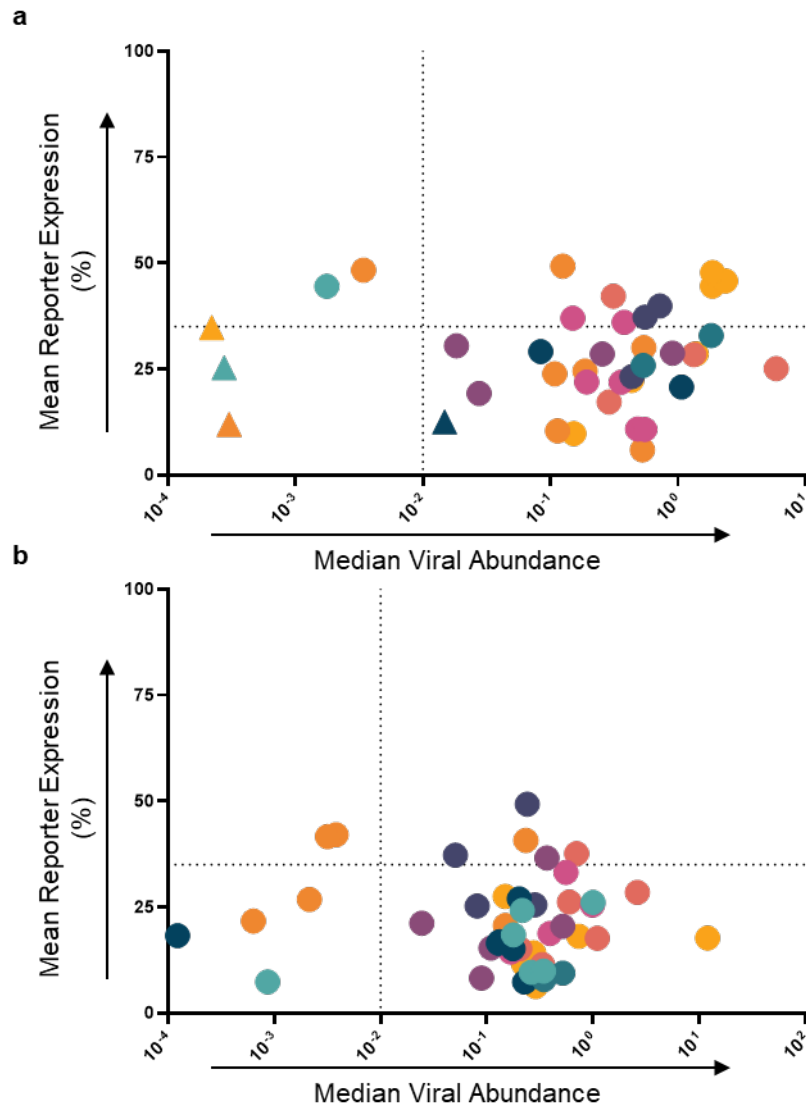

**Supporting Fig. 6 | Reporter assay hits do not correlate with activity against live virus.**

Screening results from the reporter assay are plotted against the results of the SARS-CoV-2 infection model for siRNAs (a) and ASOs (b). Mean reporter expression was obtained data from **Supporting Figure 2 and 3** for siRNAs and ASOs, respectively. Median viral abundance was obtained data from **Supporting Figure 4 and 5** for siRNAs and ASOs, respectively. Triangles indicate the lead siRNAs selected in screening. Dotted lines indicate 35% silencing in reporter expression and 99% reduction in viral abundance.

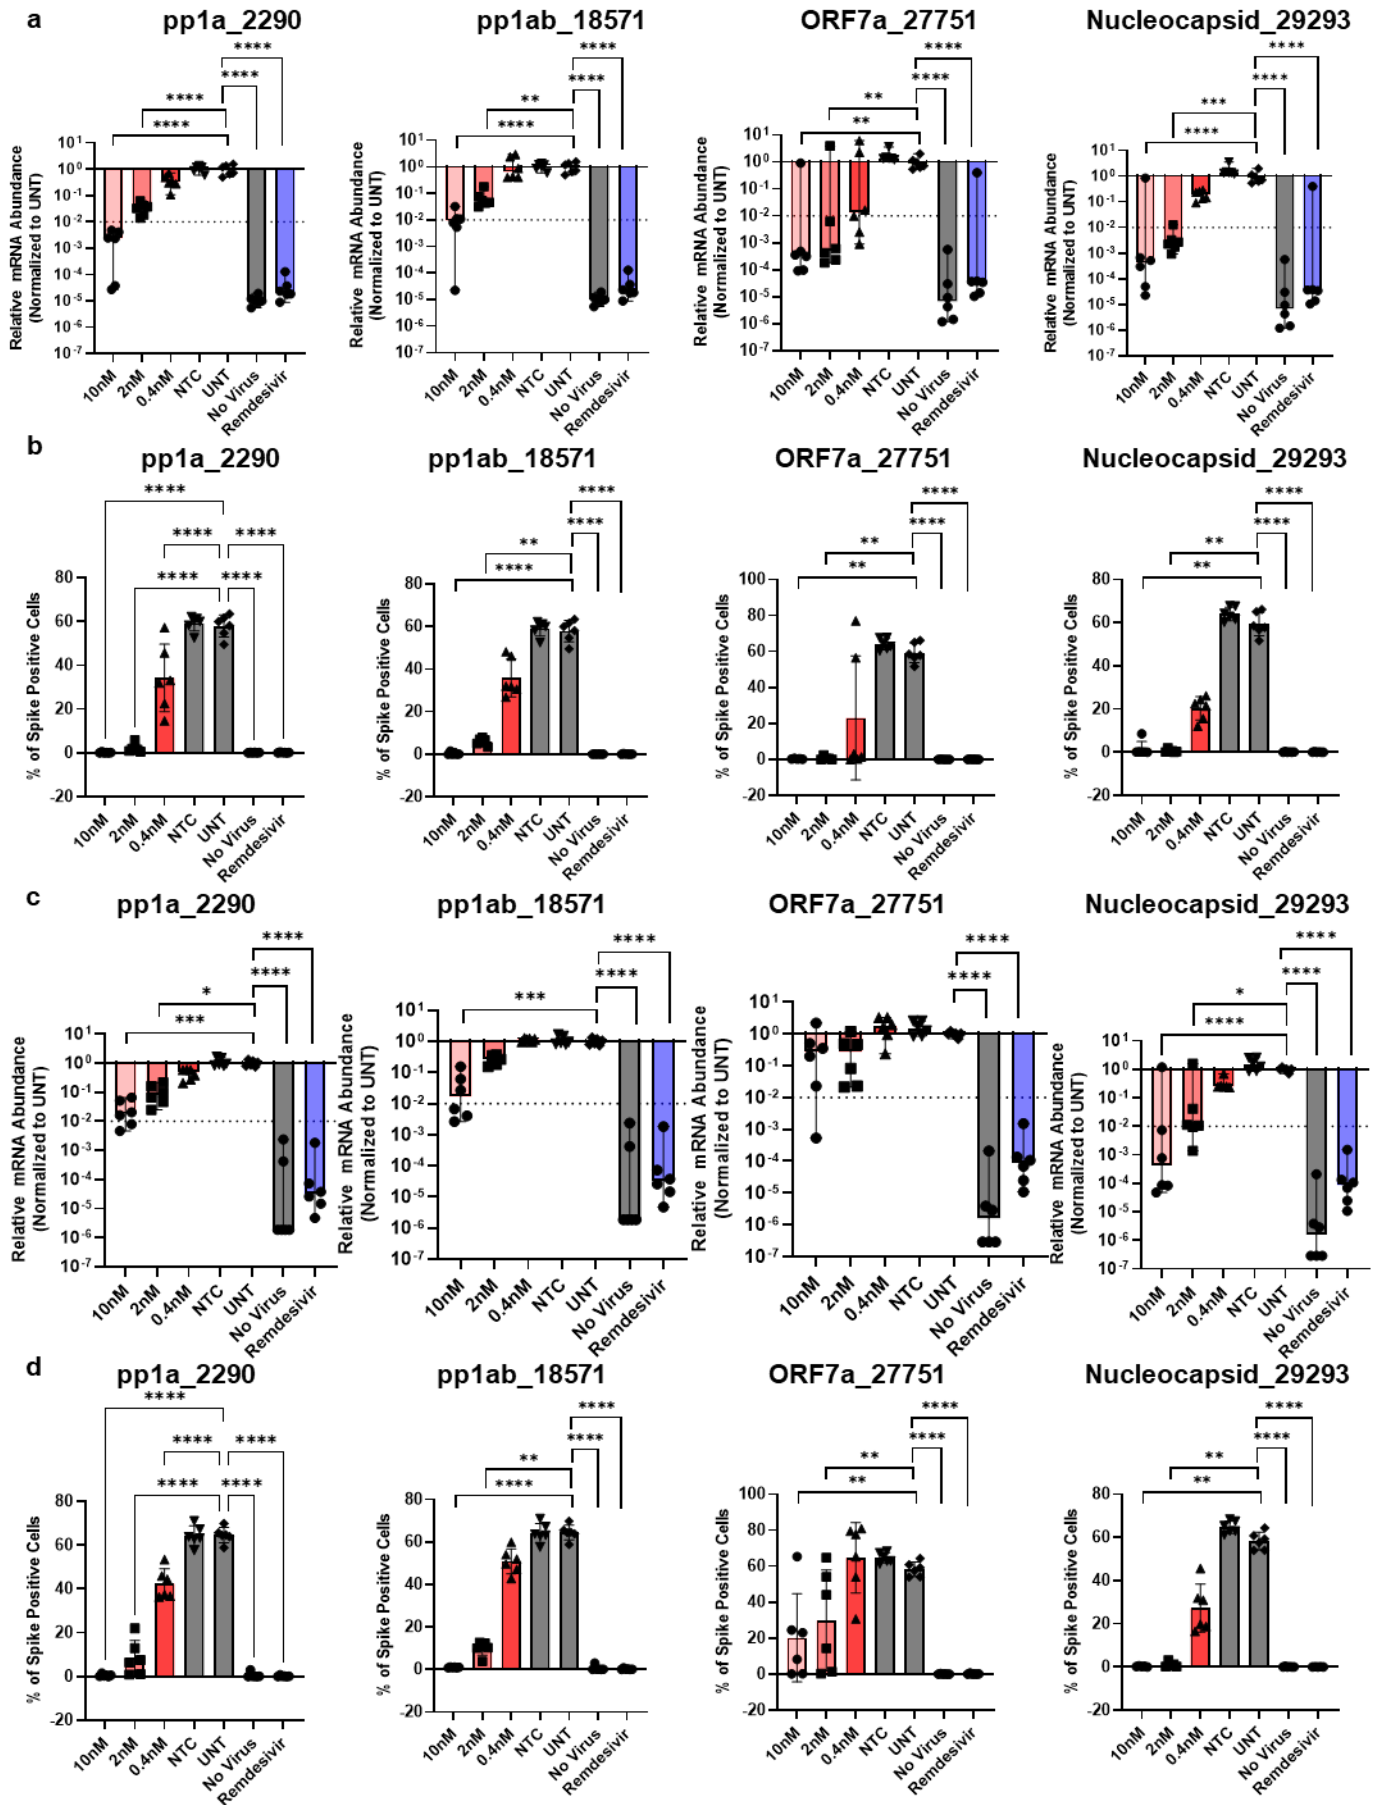

**Supporting Fig. 7 | Lead siRNA potently block SARS-CoV-2 infection (matched to Fig. 2b,c).** Samples collected and analyzed from A549<sup>ACE2plus</sup> cells 48 hours post-infection of SARS-CoV-2 with MOI 0.1 (a,b) or 0.4 (c,d). siRNAs were transfected 36 hours prior to the infection (n=6; concentration indicated). Remdesivir with 5  $\mu$ M was used as a positive control for antiviral activity. No virus represents cells which were not infected with virus. **a,c,** Abundance of viral mRNA was measured by qRT-PCR. Data presented relative to UNT (median  $\pm$  95% CI of independent biological replicates; NTC/UNT/no virus: dark grey, remdesivir: blue). Dotted line indicates 99% reduction in mRNA abundance. **b,d,** Percent of spike protein positive cells were determined by immunofluorescence staining (mean  $\pm$  SD of independent biological replicates; NTC/UNT/no virus: dark grey, remdesivir: blue). One-way ANOVA with Dunnett test for multiple comparisons (\*\*\*\*P < 0.0001, \*\*\*P < 0.001, \*\*P < 0.01, \*P < 0.05). MOI, multiplicity of infection; NTC, non-targeting control; UNT, untreated control.

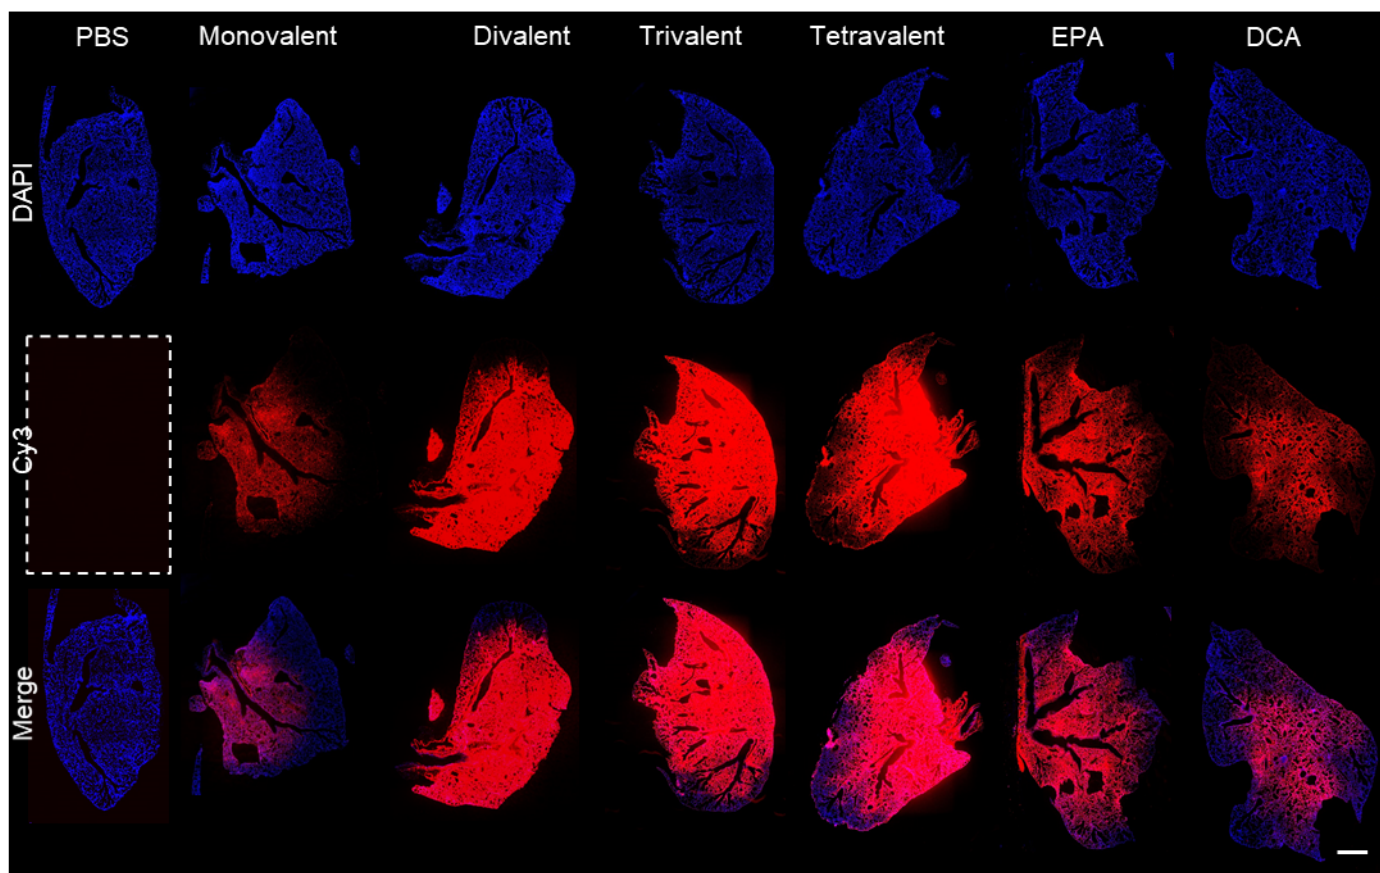

**Supporting Fig. 8 | Single channel images of Figure 3c (top).** Distribution of siRNA (Cy3, red) with staining of DAPI (blue). Original magnification,  $\times 5$ . Scale bar: 1 mm.



a

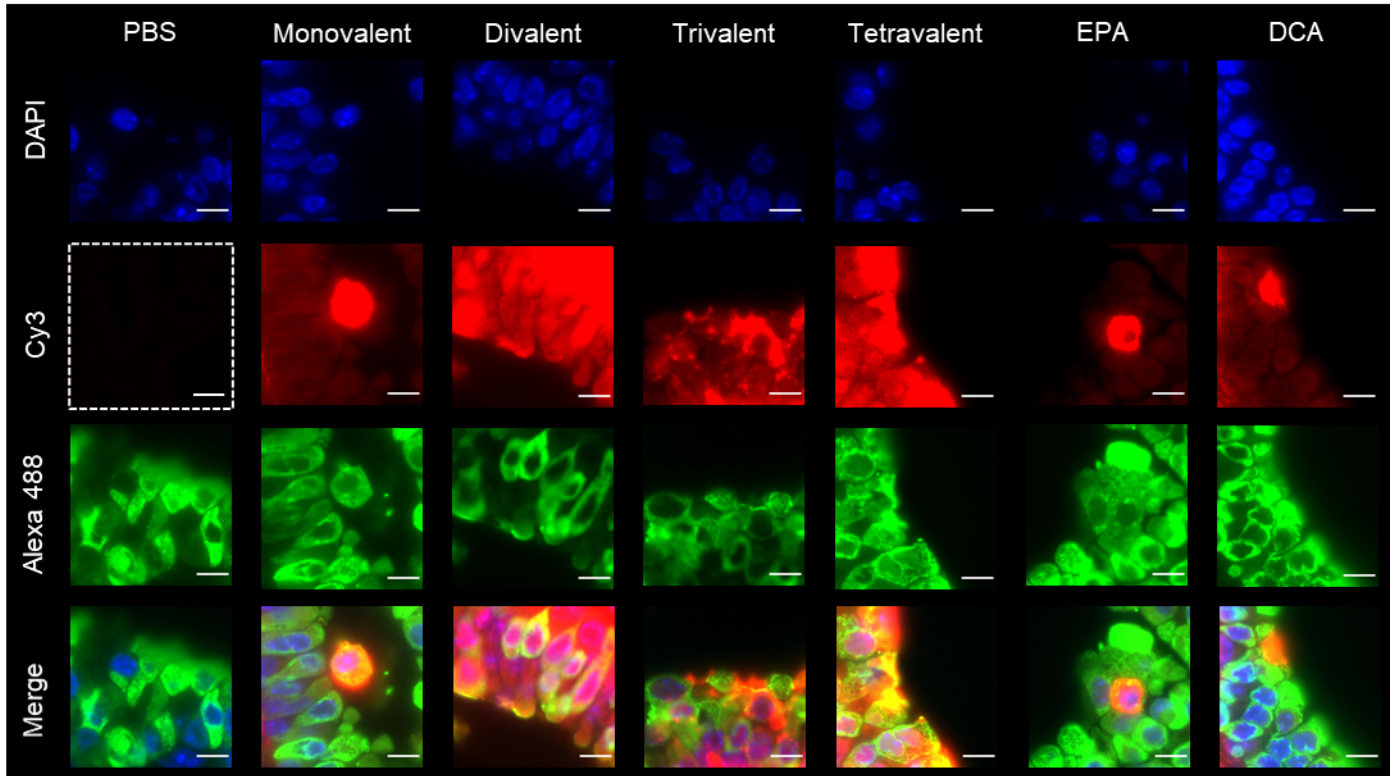

b

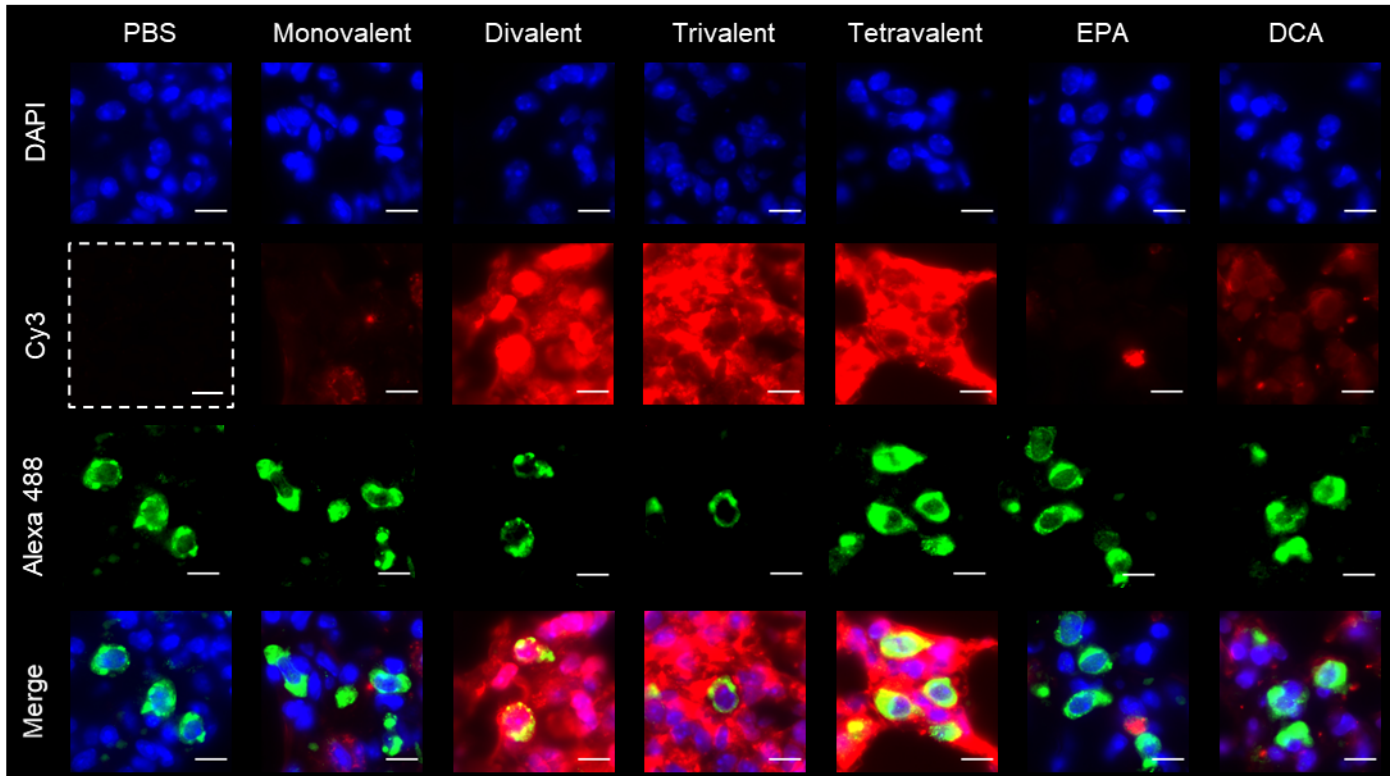

**Supporting Fig. 9 | Single channel images of Figure 3c (middle and bottom). a**, distribution of siRNA (Cy3, red) with staining of club cells (AlexaFluor 488, green), and DAPI (blue). **b**, Distribution of siRNA (Cy3, red) with staining of type II alveoli (AlexaFluor 488, green), and DAPI (blue). Original magnification,  $\times 40$ . Scale bar: 10  $\mu\text{m}$ .

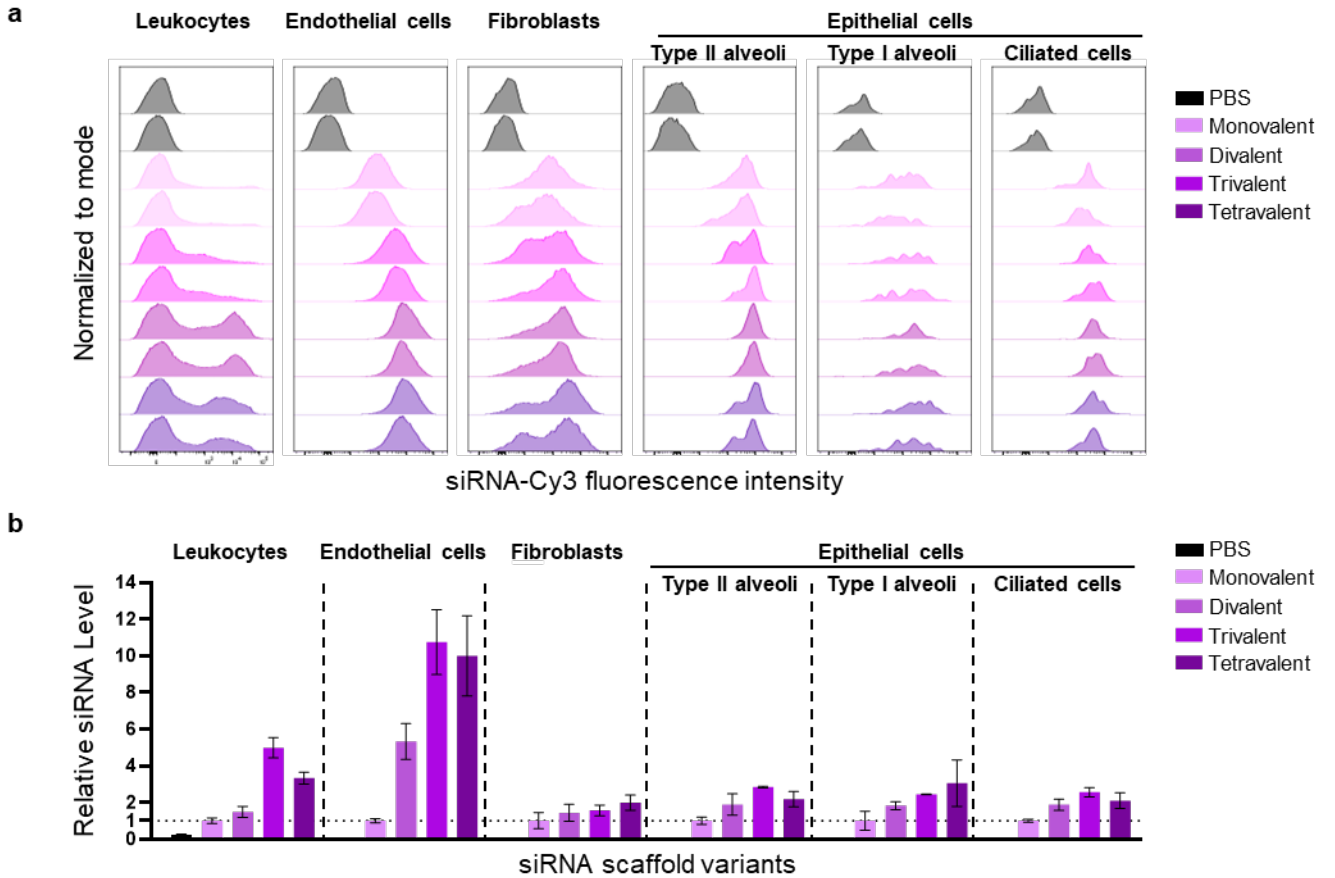

**Supporting Fig. 10 | Local administration of multivalent fully chemically modified siRNA supports improved accumulation in different lung cell populations.**

siRNA uptake in leukocytes ( $CD45^+$ ), endothelial cells ( $CD45^-CD31^+CD326^-$ ), fibroblasts ( $CD45^-CD31^-CD326^-CD140a^+$ ), type II alveoli ( $CD45^-CD31^-CD326^{med}MHCII^+$ ), type I alveoli ( $CD45^-CD31^-CD326^{low}MHCII^-$ ), and ciliated cells ( $CD45^-CD31^-CD326^{hi}MHCII^-$ ) after intratracheal injection of siRNA in mice sacrificed at 24 hours measured from flow cytometry analysis ( $n=2$  mice; 3.75 mg/kg). **a**, Histograms presented Cy3 labeled siRNA fluorescence intensity. Each histogram represents independent biological replicates. **b**, Geometric mean fluorescence intensity presented relative to monovalent siRNA of each cell population (mean  $\pm$  SD of independent biological replicates).

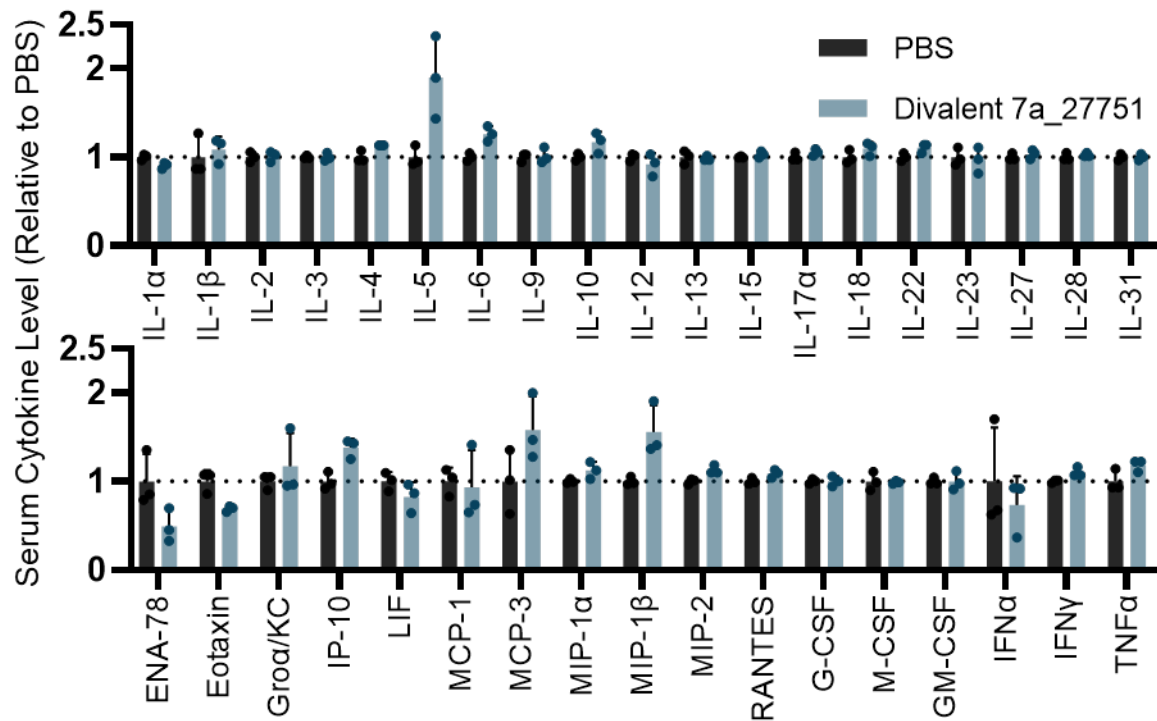

**Supporting Fig. 11 | Local administration of high dose divalent fully chemically modified siRNA does not induce serum a cytokine response.** Serum cytokine levels 24 hours after intratracheal injection of high dose lead divalent siRNA (n=3 mice; 50 mg/kg). Data presented relative to PBS (mean ± SD of independent biological replicates). One-way ANOVA with Dunnett test for multiple comparisons (\*\*\*)P < 0.001). Dotted lines indicate basal level. EPA, eicosapentaenoic acid; DCA, docosanoic acid; NTC, non-targeting control.

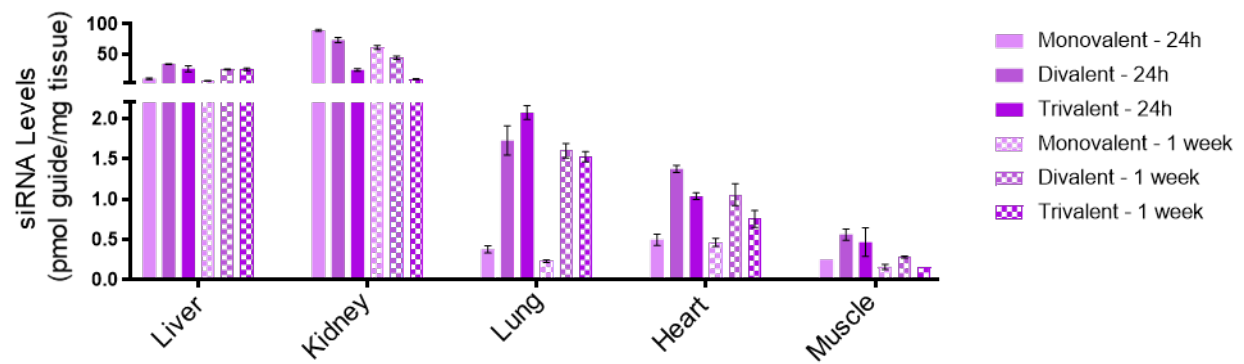

**Supporting Fig. 12 | Systemic administration of multivalent fully chemically modified siRNA supports improved lung accumulation.** Tissue siRNA levels after subcutaneous injection of siRNA in mice sacrificed at 24 hours (filled) and 1 week (checkered) post-injection measured by PNA hybridization assay (n=2 mice; 20 mg/kg; mean  $\pm$  SD of independent biological replicates).

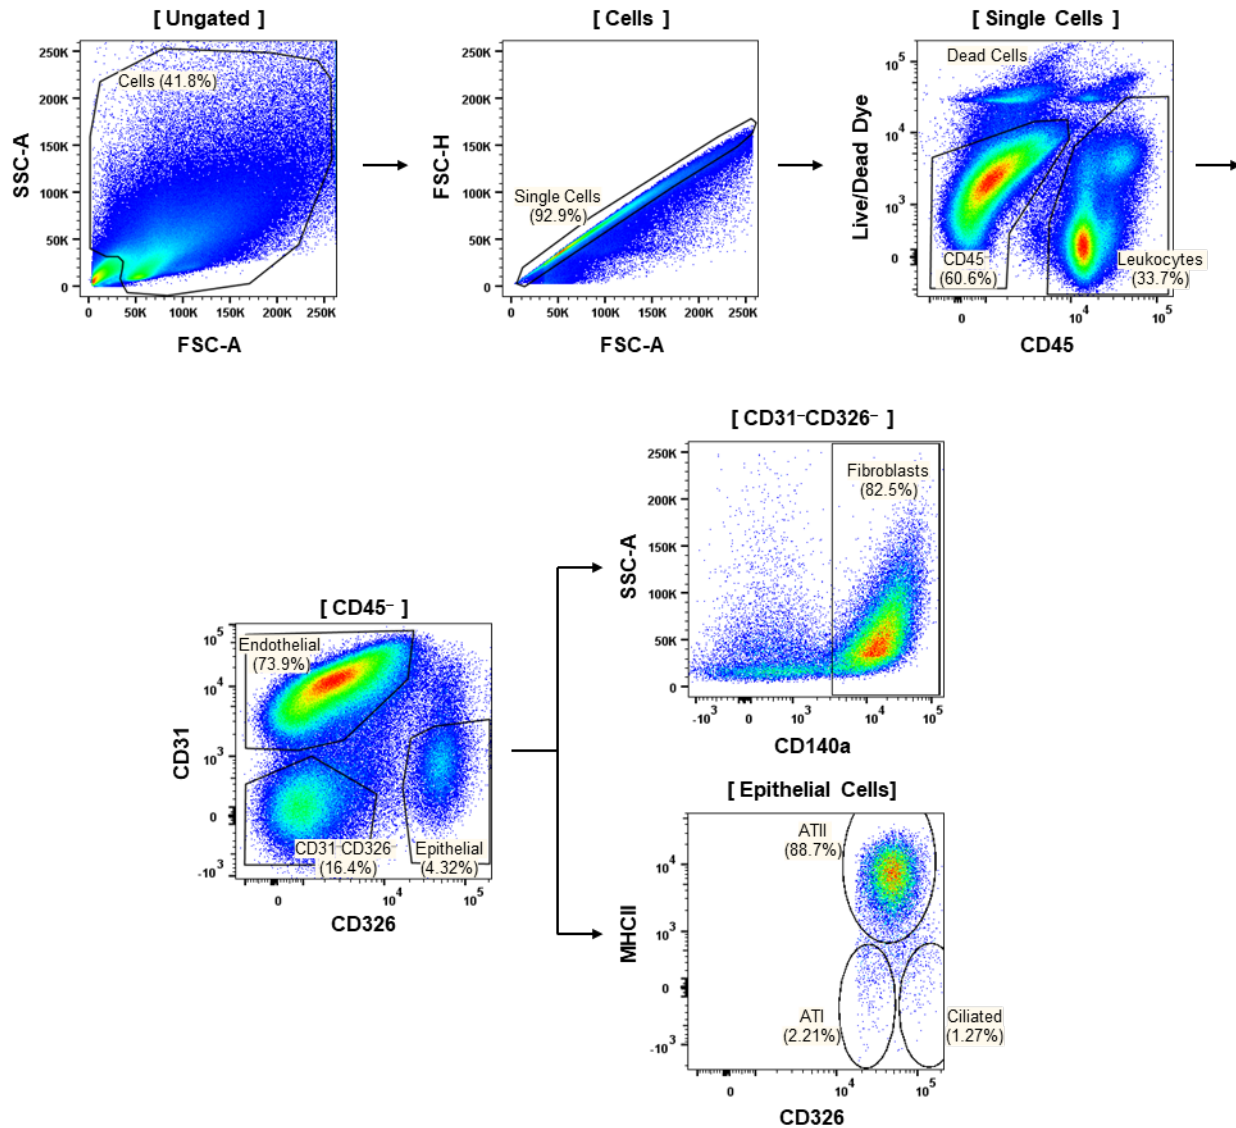

**Supporting Fig. 13 | Flow cytometry gating.** Debris and non-single cells were excluded by gating on FSC-A×SSC-A and FSC-A×FSC-H. The cell population of different cell types was separated as follows: leukocytes (CD45<sup>+</sup>), endothelial cells (CD45<sup>-</sup>CD31<sup>+</sup>CD326<sup>-</sup>), fibroblasts (CD45<sup>-</sup>CD31<sup>-</sup>CD326<sup>-</sup>CD140a<sup>+</sup>), epithelial cells (CD45<sup>-</sup>CD31<sup>-</sup>CD326<sup>+</sup>), type II alveoli (CD45<sup>-</sup>CD31<sup>-</sup>CD326<sup>med</sup>MHCII<sup>+</sup>), type I alveoli (CD45<sup>-</sup>CD31<sup>-</sup>CD326<sup>low</sup>MHCII<sup>-</sup>), and ciliated cells (CD45<sup>-</sup>CD31<sup>-</sup>CD326<sup>hi</sup>MHCII<sup>-</sup>). A percentage of each cell population to the parent population was presented.
